# Supplementary material for: How Do People Become W.E.I.R.D.? Migration Reveals the Cultural Transmission Mechanisms Underlying Variation in Psychological Processes
Source: PLoS One. 2016 Jan 13;11(1):e0147162. doi: 10.1371/journal.pone.0147162 (PMC4711941; doi:10.1371/journal.pone.0147162)
Supplement: S2 File — (CSV) [file pone.0147162.s002.csv]

partid	age	sex	country_born	mother_countryborn	father_countryborn	s1_q1	s1_q2	s1_q3	s1_q4	s1_q5	s1_q6	s1_q7	s1_q8	s1_q9	s1_q10	s1_q11	s1_q12	s1_q13	s1_q14	s1_q15	s1_q16	s2_q2_closeness	s3_q1	s3_q2	s3_q3	s3_q4	s3_q5	s3_q6	s3_q7	s3_q8	s3_q9	s3_q10	s4_q1	s4_q2	s4_q3	s4_q4	s4_q5	s4_q6	s4_q7	s4_q8	s4_q9	s4_q10	s5_q1a	s5_q1b	s5_q1c	s5_q1d	s5_q2a	s5_q2b	s5_q2c
1	42	Male	Bangladesh	Bangladesh	Bangladesh	1	1	5	5	1	3	3	4	3	4	4	1	5	2	4	7	6	50	50	50	50	50	50	50	50	50	50	Holistic	Holistic	Holistic	Holistic	Holistic	Holistic	Analytic	Holistic	Holistic	Holistic	5	1	5	1	1	5	3
2	53	Male	Bangladesh	Bangladesh	Bangladesh	1	1	6	6	1	4	4	3	3	5	3	1	6	2	5	6	6	5	7	5	5	2	2	9	5	2	7	Analytic	Analytic	Holistic	Analytic	Holistic	Holistic	Analytic	Analytic	Analytic	Holistic	6	1	5	1	1	4	5
3	51	Male	Bangladesh	Bangladesh	Bangladesh	1	1	1	2	1	1	2	1	2	7	2	2	3	5	2	2	1	80	90	50	70	10	10	95	90	80	50	Holistic	Holistic	Holistic	Holistic	Holistic	Analytic	Holistic	Analytic	Holistic	Holistic	7	6	2	6	3	5	6
4	53	Male	Bangladesh	Bangladesh	Bangladesh	1	1	5	7	1	1	2	1	3	5	3	1	5	1	5	5	6	60	60	80	60	20	80	80	50	50	70	Analytic	Analytic	Holistic	Analytic	Holistic	Holistic	Analytic	Analytic	Holistic	Analytic	5	3	5	1	1	5	3
5	60	Female	Bangladesh	Bangladesh	Bangladesh	1	1	1	7	1	1	1	7	7	1	3	1	1	1	5	3	7	5	5	5	5	5	5	5	5	5	5	Analytic	Holistic	Holistic	Holistic	Holistic	Holistic	Holistic	Holistic	Holistic	Holistic	7	2	6	1	1	5	5
6	41	Female	Bangladesh	Bangladesh	Bangladesh	1	1	2	2	1	1	1	1	2	2	1	1	1	2	1	2	6	NA	NA	NA	NA	NA	NA	NA	NA	NA	NA	Holistic	Holistic	Holistic	Analytic	Holistic	Holistic	Holistic	Holistic	Holistic	Holistic	1	1	4	4	3	2	1
7	45	Female	Bangladesh	Bangladesh	Bangladesh	1	1	6	7	1	3	1	3	3	5	4	1	5	1	4	4	7	60	60	20	40	20	50	70	20	20	70	Holistic	Holistic	Holistic	Holistic	Holistic	Holistic	Holistic	Holistic	Holistic	Holistic	5	1	5	1	1	5	5
8	41	Female	Bangladesh	Bangladesh	Bangladesh	1	1	3	5	1	1	1	1	3	3	4	1	3	1	4	5	7	80	30	50	50	50	50	30	20	70	90	Holistic	Holistic	Holistic	Holistic	Holistic	Holistic	Holistic	Holistic	Holistic	Holistic	3	1	4	1	1	5	3
9	29	Female	Bangladesh	Bangladesh	Bangladesh	2	2	4	5	1	3	5	1	1	2	1	2	1	3	2	5	6	50	10	10	50	10	10	30	10	10	30	Holistic	Holistic	Holistic	Holistic	Holistic	Holistic	Holistic	Holistic	Holistic	Holistic	3	1	4	1	2	3	1
10	30	Female	Bangladesh	Bangladesh	Bangladesh	1	2	5	6	1	2	1	1	7	1	3	1	1	1	1	1	2	80	60	30	90	50	40	95	80	75	55	Holistic	Holistic	Holistic	Holistic	Holistic	Holistic	Holistic	Holistic	Holistic	Holistic	1	3	3	1	2	3	1
11	30	Female	Bangladesh	Bangladesh	Bangladesh	1	1	3	4	1	1	1	1	1	1	1	1	1	1	3	1	3	10	35	25	65	40	35	40	20	25	18	Holistic	Holistic	Holistic	Holistic	Holistic	Holistic	Analytic	Analytic	Holistic	Holistic	4	3	6	2	2	4	4
12	29	Female	Bangladesh	Bangladesh	Bangladesh	1	1	5	7	1	2	1	2	2	2	1	2	3	1	1	3	4	30	20	10	10	20	10	7	10	7	10	Holistic	Holistic	Holistic	Holistic	Holistic	Holistic	Holistic	Holistic	Holistic	Holistic	2	1	1	2	2	3	2
13	23	Male	Bangladesh	Bangladesh	Bangladesh	1	1	3	4	1	3	1	2	4	1	3	5	3	5	2	7	5	60	50	20	70	20	30	40	10	70	10	Holistic	Holistic	Holistic	Holistic	Holistic	Holistic	Holistic	Holistic	Holistic	Holistic	3	2	3	3	4	2	3
14	25	Male	Bangladesh	Bangladesh	Bangladesh	1	1	3	7	1	2	1	3	5	2	1	1	1	5	2	2	2	50	60	20	40	30	10	40	10	70	50	Holistic	Holistic	Holistic	Holistic	Holistic	Holistic	Holistic	Holistic	Holistic	Holistic	2	1	4	2	3	2	3
15	34	Male	Bangladesh	Bangladesh	Bangladesh	1	1	2	3	1	2	2	2	1	1	2	1	2	1	1	2	7	100	100	100	100	100	100	100	100	10	90	Holistic	Holistic	Holistic	Holistic	Holistic	Analytic	Holistic	Holistic	Holistic	Holistic	1	1	4	2	5	1	1
16	24	Male	Bangladesh	Bangladesh	Bangladesh	1	1	1	1	1	2	1	1	1	1	1	2	1	1	3	1	6	50	40	10	30	20	40	60	80	70	20	Holistic	Holistic	Holistic	Holistic	Holistic	Holistic	Holistic	Holistic	Holistic	Holistic	7	3	7	1	1	7	2
17	22	Female	England	Bangladesh	Bangladesh	1	2	4	2	1	1	2	1	2	3	2	2	2	1	2	2	6	50	20	30	50	10	20	50	70	20	50	Holistic	Holistic	Holistic	Holistic	Holistic	Holistic	Holistic	Holistic	Holistic	Holistic	2	1	6	3	3	2	1
18	23	Female	England	Bangladesh	Bangladesh	1	1	3	5	3	5	5	2	1	3	5	2	1	1	1	1	7	50	50	50	50	50	50	50	50	50	50	Holistic	Holistic	Holistic	Holistic	Holistic	Holistic	Holistic	Holistic	Holistic	Holistic	1	5	3	3	3	1	1
19	27	Male	England	Bangladesh	Bangladesh	2	2	2	2	3	5	6	4	1	1	3	1	2	3	2	2	6	40	30	20	40	40	40	40	40	30	30	Holistic	Holistic	Holistic	Analytic	Holistic	Holistic	Holistic	Holistic	Holistic	Holistic	1	3	2	3	3	1	1
20	21	Male	England	Bangladesh	Bangladesh	2	2	1	1	3	6	6	6	1	1	5	1	1	1	2	2	7	50	50	50	50	50	50	50	50	50	50	Holistic	Holistic	Holistic	Holistic	Holistic	Holistic	Holistic	Holistic	Holistic	Holistic	3	3	1	4	1	2	1
21	18	Male	England	Bangladesh	Bangladesh	2	2	3	6	3	2	2	2	4	3	3	2	3	4	3	3	3	45	45	35	55	35	45	40	65	35	45	Analytic	Analytic	Analytic	Analytic	Analytic	Analytic	Analytic	Analytic	Analytic	Analytic	3	3	7	2	4	3	5
22	23	Male	England	Bangladesh	Bangladesh	1	1	2	2	3	4	7	3	1	1	1	1	1	3	1	1	6	50	0	75	25	0	90	50	0	50	25	Holistic	Holistic	Holistic	Holistic	Holistic	Holistic	Holistic	Holistic	Holistic	Holistic	1	1	3	1	5	1	1
23	18	Female	England	Bangladesh	Bangladesh	2	1	4	3	1	3	2	1	2	3	1	1	2	4	1	3	4	42	1	31	93	2	33	19	16	0	3	Holistic	Holistic	Holistic	Holistic	Holistic	Holistic	Holistic	Holistic	Holistic	Holistic	1	1	5	2	1	7	2
24	22	Female	England	Bangladesh	Jamaica	1	2	4	4	4	4	4	4	4	4	4	4	4	2	2	4	7	50	50	50	70	30	30	50	50	50	50	Holistic	Holistic	Holistic	Holistic	Holistic	Holistic	Holistic	Holistic	Holistic	Holistic	4	4	4	4	4	4	4
25	58	Female	England	Austria	Ireland	1	1	5	4	3	2	1	1	3	4	4	1	1	2	1	1	6	50	30	20	50	10	10	10	10	20	50	Holistic	Holistic	Holistic	Holistic	Holistic	Holistic	Analytic	Holistic	Holistic	Holistic	4	4	6	4	4	3	4
26	45	Female	England	England	Engand	2	3	4	7	6	2	2	4	5	2	5	2	2	3	4	4	7	50	50	50	50	20	20	50	50	50	70	Holistic	Holistic	Holistic	Holistic	Holistic	Holistic	Holistic	Holistic	Holistic	Holistic	2	2	3	3	2	3	3
27	48	Female	England	England	Engand	2	2	2	2	2	2	2	2	2	3	2	4	2	3	3	4	4	10	20	10	30	20	10	20	10	30	20	Holistic	Holistic	Holistic	Analytic	Holistic	Holistic	Analytic	Holistic	Holistic	Holistic	2	3	2	2	2	3	3
28	53	Male	England	England	Engand	4	1	7	5	1	3	5	6	4	1	2	4	1	5	1	1	2	75	75	30	40	20	20	50	50	10	75	Holistic	Analytic	Analytic	Analytic	Holistic	Holistic	Analytic	Holistic	Holistic	Analytic	4	7	4	4	3	5	4
29	49	Male	England	England	Engand	3	5	5	6	3	3	3	4	3	3	3	6	3	3	2	1	3	25	25	35	65	25	35	50	30	40	50	Holistic	Holistic	Holistic	Holistic	Holistic	Holistic	Holistic	Holistic	Holistic	Holistic	3	3	3	4	3	1	1
30	45	Female	Scotland	Scotland	Scotland	1	1	3	3	2	4	2	2	3	1	3	1	2	3	3	3	4	20	10	16	20	20	20	10	20	10	20	Holistic	Holistic	Holistic	Analytic	Holistic	Holistic	Analytic	Holistic	Analytic	Holistic	2	2	2	2	2	2	2
31	55	Male	England	England	Engand	1	2	5	6	2	3	3	4	2	2	3	3	1	4	2	2	6	50	50	25	20	25	20	10	25	25	25	Analytic	Holistic	Holistic	Holistic	Holistic	Holistic	Holistic	Holistic	Holistic	Holistic	1	3	4	2	4	1	2
32	63	Male	England	England	Engand	1	2	6	3	1	1	4	2	7	2	3	6	4	2	2	4	6	20	50	30	30	20	20	60	50	20	50	Holistic	Holistic	Holistic	Holistic	Holistic	Holistic	Holistic	Holistic	Holistic	Holistic	1	3	5	6	2	1	6
33	24	Male	England	England	Engand	3	5	5	4	2	3	2	3	2	2	3	3	2	2	2	2	4	20	20	30	40	25	50	20	40	60	20	Holistic	Holistic	Holistic	Holistic	Holistic	Holistic	Holistic	Holistic	Holistic	Holistic	1	5	4	4	3	3	1
34	26	Male	England	England	England	5	5	1	3	3	4	4	1	1	1	1	5	1	4	1	1	4	40	30	60	10	50	50	10	10	50	10	Holistic	Holistic	Holistic	Holistic	Holistic	Holistic	Holistic	Holistic	Holistic	Holistic	1	5	1	3	5	1	3
35	24	Male	England	England	Engand	5	6	1	2	3	5	6	3	1	1	2	5	1	5	1	1	1	10	10	60	10	60	60	10	50	20	10	Holistic	Holistic	Holistic	Holistic	Holistic	Holistic	Holistic	Holistic	Holistic	Holistic	1	5	2	3	3	1	3
36	25	Male	England	England	Engand	1	3	6	2	1	2	3	1	3	1	2	5	6	1	1	2	2	80	10	30	10	25	30	70	60	50	40	Analytic	Analytic	Analytic	Analytic	Analytic	Analytic	Analytic	Analytic	Analytic	Analytic	1	6	2	1	7	2	3
37	29	Female	England	England	Engand	2	1	1	3	3	7	7	3	1	1	5	1	1	3	1	1	6	35	10	70	50	70	41	80	23	81	61	Holistic	Holistic	Holistic	Holistic	Holistic	Holistic	Holistic	Holistic	Holistic	Holistic	1	3	3	5	5	1	1
38	22	Female	England	England	Engand	2	3	5	7	2	1	1	2	3	1	2	7	1	3	1	1	7	70	70	50	50	2	10	5	30	10	95	Holistic	Holistic	Holistic	Analytic	Holistic	Holistic	Analytic	Analytic	Holistic	Holistic	1	3	3	6	7	4	2
39	25	Female	England	England	Engand	5	6	1	2	4	4	4	5	1	1	5	5	2	5	1	1	2	50	30	70	30	50	50	20	40	70	20	Holistic	Holistic	Holistic	Holistic	Holistic	Holistic	Holistic	Holistic	Holistic	Holistic	1	5	1	5	1	2	3
40	28	Male	England	England	Engand	5	5	2	4	2	3	3	1	1	2	5	5	1	4	1	1	4	40	40	50	30	60	40	20	20	40	20	Holistic	Holistic	Holistic	Holistic	Holistic	Holistic	Holistic	Holistic	Holistic	Holistic	2	3	2	3	5	1	1
41	30	Female	Bangladesh	Bangladesh	Bangladesh	1	1	3	4	1	1	1	1	2	2	1	1	1	2	1	1	5	99	100	90	75	25	40	50	80	50	70	Analytic	NA	Analytic	NA	NA	NA	NA	NA	NA	NA	1	2	6	4	4	3	2
42	21	Female	England	Bangladesh	Bangladesh	6	2	5	2	3	4	4	4	3	3	4	2	3	5	3	6	4	50	60	40	60	40	40	60	50	40	70	Holistic	Holistic	Holistic	Holistic	Holistic	Holistic	Holistic	Holistic	Holistic	Holistic	2	2	6	4	6	4	1
43	18	Female	England	Bangladesh	Bangladesh	1	2	6	3	4	1	3	1	4	3	3	1	1	4	4	2	4	99	99	95	99	90	90	50	50	90	90	Analytic	Analytic	Analytic	Analytic	Holistic	Holistic	Analytic	Analytic	Analytic	Holistic	3	3	6	4	4	3	3
44	42	Male	Bangladesh	Bangladesh	Bangladesh	1	1	1	7	2	1	1	1	1	1	1	1	1	1	1	1	7	50	50	50	50	50	60	70	70	70	70	Holistic	Holistic	Holistic	Holistic	Holistic	Holistic	Holistic	Holistic	Holistic	Holistic	1	1	1	1	1	1	1
45	40	Female	Bangladesh	Bangladesh	Bangladesh	1	1	3	4	3	4	2	2	2	1	1	3	4	2	2	4	7	60	60	50	70	30	50	70	65	55	65	Holistic	Holistic	Holistic	Holistic	Holistic	Holistic	Holistic	Holistic	Holistic	Holistic	3	5	4	3	4	4	4
46	19	Male	England	Bangladesh	Bangladesh	1	1	3	4	2	2	2	2	2	2	3	2	1	2	1	2	5	45	40	45	55	20	20	20	30	30	40	Holistic	Holistic	Holistic	Analytic	Analytic	Holistic	Analytic	Holistic	Holistic	Holistic	2	5	6	3	3	2	2
47	24	Male	England	bangladesh	Bangladesh	1	1	4	4	2	3	2	2	3	4	4	1	1	3	1	1	4	50	10	10	50	0	0	70	0	0	0	Holistic	Analytic	Analytic	Analytic	Holistic	Holistic	Holistic	Holistic	Holistic	Holistic	1	4	4	1	3	4	4
48	19	Female	England	bangladesh	bangladesh	1	1	6	6	1	1	1	1	2	1	2	2	1	2	1	2	6	80	50	80	50	1	10	70	40	30	50	Holistic	Analytic	Holistic	Analytic	Holistic	Holistic	Analytic	Analytic	Holistic	Holistic	2	2	6	2	5	2	1
49	20	Female	England	bangladesh	bangladesh	3	3	3	3	2	4	4	3	4	3	2	2	2	2	2	4	6	65	40	40	50	25	30	60	50	30	40	Holistic	Holistic	Holistic	Analytic	Holistic	Holistic	Analytic	Analytic	Holistic	Holistic	3	2	4	4	3	2	2
50	18	Male	USA	bangladesh	bangladesh	3	3	1	1	3	3	3	2	1	2	1	5	2	3	2	2	1	60	20	50	20	70	30	30	50	90	30	Holistic	Analytic	Holistic	Holistic	Holistic	Holistic	Holistic	Holistic	Holistic	Holistic	2	4	7	2	3	1	3
51	18	Male	england	england	england	1	4	5	7	1	2	2	2	2	2	4	1	2	4	4	3	7	25	10	50	30	60	50	50	80	50	10	Holistic	Holistic	Holistic	Holistic	Holistic	Holistic	Holistic	Holistic	Holistic	Holistic	3	4	4	3	7	3	2
52	45	Female	england	england	england	1	2	4	5	1	1	1	1	3	2	2	2	2	2	2	1	7	50	50	50	50	80	80	90	50	50	50	Holistic	Holistic	Holistic	Holistic	Holistic	Holistic	Holistic	Holistic	Holistic	Holistic	1	4	5	5	4	2	2
53	49	Female	england	england	england	1	5	5	4	3	2	1	3	2	1	1	5	1	6	3	1	1	95	75	25	50	25	25	5	20	80	80	Analytic	Analytic	Analytic	Analytic	Analytic	Analytic	Analytic	Analytic	Analytic	Analytic	1	4	5	4	3	3	2
54	32	Male	bangladesh	bangladesh	bangladesh	1	1	7	7	1	1	1	1	1	1	1	1	1	1	7	1	4	100	50	0	100	0	20	0	0	30	0	Holistic	Holistic	Holistic	Holistic	Holistic	Holistic	Holistic	Holistic	Analytic	Holistic	1	1	7	1	1	7	2
55	53	Male	england	england	england	1	1	3	4	1	2	1	1	2	1	2	1	1	2	1	1	4	60	50	20	50	5	10	10	10	5	30	Holistic	Holistic	Holistic	Analytic	Holistic	Holistic	Holistic	Holistic	Holistic	Holistic	1	2	4	1	1	2	1
56	19	Female	england	bangladesh	bangladesh	2	1	3	5	2	2	2	1	6	3	3	1	2	2	2	2	7	50	30	60	45	70	60	50	60	67	40	Holistic	Holistic	Holistic	Holistic	Holistic	Holistic	Analytic	Holistic	Holistic	Holistic	2	2	4	6	6	1	3
57	45	Female	england	bangladesh	bangladesh	1	1	6	4	1	1	1	1	4	6	3	1	2	1	2	2	5	75	80	55	60	10	15	70	10	20	40	Holistic	Holistic	Holistic	Holistic	Holistic	Holistic	Holistic	Holistic	Holistic	Holistic	3	2	3	2	1	3	2
58	22	Female	england	england	england	3	5	2	6	2	2	4	3	1	1	1	5	1	3	1	1	4	20	15	40	40	30	40	20	30	30	20	Holistic	Holistic	Holistic	Holistic	Holistic	Holistic	Holistic	Holistic	Holistic	Holistic	2	1	4	4	3	4	1
59	45	Male	england	england	england	3	4	2	4	1	2	3	3	7	1	1	3	1	2	2	1	2	40	50	20	55	10	70	10	20	30	65	Holistic	Holistic	Holistic	Analytic	Holistic	Holistic	Analytic	Holistic	Holistic	Holistic	1	5	1	2	1	5	1
60	40	Female	bangladesh	bangladesh	bangladesh	1	1	7	5	3	2	1	1	1	6	3	2	4	1	5	4	3	80	70	60	70	20	10	80	20	30	40	Analytic	Analytic	Holistic	Holistic	Analytic	Holistic	Analytic	Analytic	Analytic	Analytic	4	3	3	1	2	3	2
61	45	Female	bangladesh	bangladesh	bangladesh	1	2	6	4	2	1	1	1	4	4	2	1	5	2	2	3	3	70	80	50	70	10	30	90	80	60	50	Holistic	Analytic	Holistic	Holistic	Analytic	Analytic	Analytic	Analytic	Analytic	Analytic	5	2	4	2	1	3	2
62	40	Male	england	bangladesh	bangladesh	1	2	7	4	1	2	3	1	4	5	4	1	4	4	3	4	3	95	70	30	80	60	70	50	50	20	50	Holistic	Holistic	Holistic	Holistic	Holistic	Holistic	Holistic	Holistic	Holistic	Holistic	2	2	4	5	1	3	2
63	45	Female	bangladesh	bangladesh	bangladesh	1	1	3	2	1	1	1	1	1	5	1	1	1	2	1	5	7	50	80	30	80	0	0	0	10	60	10	Analytic	Analytic	Holistic	Holistic	Holistic	Analytic	Holistic	Holistic	Holistic	Holistic	1	2	3	1	4	3	1
64	40	Male	bangladesh	bangladesh	bangladesh	1	2	1	1	3	4	5	1	1	3	2	1	2	1	4	3	2	60	80	30	70	30	40	60	65	40	25	Analytic	Analytic	Analytic	Analytic	Holistic	Analytic	Analytic	Analytic	Holistic	Analytic	3	4	6	4	3	4	3
65	48	Male	bangladesh	bangladesh	bangladesh	3	1	4	3	1	1	4	1	1	7	2	1	1	2	1	7	6	50	70	20	80	10	10	10	0	30	40	Analytic	Holistic	Holistic	Holistic	Holistic	Holistic	Holistic	Analytic	Holistic	Holistic	1	2	4	4	5	1	1
66	47	Male	bangladesh	bangladesh	bangladesh	1	1	2	6	1	1	1	1	4	1	1	2	1	4	1	1	7	50	10	5	20	0	5	5	0	60	10	Holistic	Holistic	Holistic	Holistic	Holistic	Holistic	Holistic	Holistic	Holistic	Holistic	1	1	2	1	1	4	4
67	22	Male	england	bangladesh	bangladesh	2	2	5	5	2	3	3	2	3	3	2	2	2	2	1	2	5	40	30	30	30	20	20	20	20	30	30	Holistic	Holistic	Holistic	Holistic	Holistic	Holistic	Holistic	Holistic	Holistic	Holistic	1	2	6	2	1	3	5
68	23	Male	england	bangladesh	bangladesh	2	2	3	4	3	3	3	3	3	1	2	2	2	3	1	1	4	50	30	30	50	20	20	10	20	20	20	Holistic	Holistic	Holistic	Holistic	Holistic	Holistic	Holistic	Holistic	Holistic	Holistic	1	1	6	2	2	2	3
69	46	Male	england	ireland	ireland	1	1	4	6	2	2	4	2	4	5	4	2	2	4	4	2	3	50	40	30	50	30	30	50	20	30	30	Analytic	Holistic	Analytic	Analytic	Holistic	Holistic	Analytic	Analytic	Holistic	Holistic	3	3	4	3	3	5	3
70	48	Male	bangladesh	bangladesh	bangladesh	1	1	6	6	2	1	2	2	3	3	3	1	3	2	2	5	6	70	70	40	60	40	30	60	40	30	60	Holistic	Holistic	Holistic	Holistic	Holistic	Holistic	Holistic	Holistic	Holistic	Holistic	2	2	5	4	3	2	3
71	21	Female	england	bangladesh	bangladesh	1	2	6	6	1	1	2	1	3	3	5	2	3	1	2	6	5	80	60	40	90	30	30	70	70	40	80	Holistic	Holistic	Holistic	Holistic	Holistic	Holistic	Holistic	Holistic	Holistic	Holistic	2	3	6	5	5	2	3
72	23	Female	england	bangladesh	bangladesh	2	5	2	1	1	1	1	3	2	1	2	5	1	2	1	3	4	10	20	15	30	8	10	9	20	90	10	Holistic	Holistic	Analytic	Holistic	Holistic	Holistic	Holistic	Holistic	Holistic	Holistic	2	1	5	3	3	2	1
73	41	Male	england	bangladesh	bangladesh	2	2	3	4	2	2	2	2	2	3	2	2	1	2	2	2	7	50	20	20	20	10	20	10	10	20	10	Holistic	Holistic	Holistic	Holistic	Holistic	Holistic	Holistic	Holistic	Holistic	Holistic	2	2	6	3	2	2	2
74	28	Female	england	england	england	2	1	1	1	2	4	5	3	1	1	3	1	3	3	1	1	4	0	0	50	20	20	20	0	10	20	10	Holistic	Holistic	Holistic	Holistic	Holistic	Holistic	Holistic	Holistic	Holistic	Holistic	1	1	7	1	7	7	1
75	43	Female	england	england	england	1	1	4	7	2	2	1	1	4	5	5	4	1	1	3	1	7	50	50	50	50	10	10	10	50	10	50	Holistic	Holistic	Holistic	Analytic	Holistic	Analytic	Holistic	Analytic	Analytic	Holistic	1	1	3	7	6	2	1
76	18	Male	england	bangladesh	bangladesh	5	3	6	6	2	2	2	2	6	3	4	3	4	5	4	5	7	50	50	60	0	30	40	80	60	30	50	Holistic	Holistic	Holistic	Holistic	Holistic	Holistic	Holistic	Holistic	Holistic	Holistic	2	5	6	6	4	3	2
77	18	Male	england	england	england	1	2	3	4	3	2	3	2	3	3	2	1	2	3	2	4	3	50	50	40	60	40	50	50	40	40	70	Holistic	Holistic	Holistic	Holistic	Holistic	Holistic	Holistic	Holistic	Holistic	Holistic	2	4	6	4	4	3	4
78	47	Female	england	england	england	1	1	4	6	2	1	2	2	3	3	4	1	2	1	4	3	5	80	50	20	50	30	50	30	40	30	70	Analytic	Holistic	Analytic	Analytic	Holistic	Holistic	Analytic	Analytic	Analytic	Holistic	1	2	6	1	2	3	3
79	23	Female	england	england	england	3	2	4	3	2	2	4	2	3	5	1	4	2	2	1	3	4	40	40	30	60	10	10	40	60	20	50	Analytic	Analytic	Analytic	Holistic	Holistic	Holistic	Analytic	Analytic	Holistic	Analytic	2	5	6	3	5	2	2
80	28	Female	england	bangladesh	bangladesh	1	1	7	7	1	1	1	2	5	1	7	1	1	3	1	1	2	90	50	10	60	5	10	30	30	10	15	Holistic	Holistic	Analytic	Analytic	Analytic	Holistic	Holistic	Holistic	Holistic	Holistic	1	1	7	4	3	1	1
81	51	Female	bangladesh	bangladesh	bangladesh	1	1	3	4	2	3	2	2	6	5	2	1	3	2	3	3	7	70	70	30	90	10	10	30	10	10	30	Holistic	Holistic	Holistic	Holistic	Holistic	Holistic	Holistic	Holistic	Holistic	Holistic	2	2	7	2	1	1	2
82	19	Female	bangladesh	bangladesh	bangladesh	2	1	4	6	2	3	2	3	3	3	4	2	1	2	3	3	5	30	40	20	50	40	30	20	30	40	50	Holistic	Holistic	Holistic	Holistic	Holistic	Holistic	Holistic	Holistic	Holistic	Holistic	3	2	4	3	3	4	2
83	25	Male	bangladesh	bangladesh	bangladesh	2	2	3	5	2	3	3	2	3	3	2	2	2	3	2	3	4	40	20	25	40	10	10	15	25	25	15	Holistic	Holistic	Holistic	Holistic	Holistic	Holistic	Holistic	Holistic	Holistic	Holistic	2	2	7	2	1	1	2
84	41	Female	england	england	england	3	3	5	6	2	3	3	3	5	3	3	3	2	2	2	2	5	40	30	10	40	10	10	10	10	10	30	Holistic	Analytic	Holistic	Holistic	Holistic	Holistic	Analytic	Analytic	Holistic	Holistic	1	2	7	2	3	1	2
85	24	Female	england	england	england	6	6	2	3	3	3	3	3	2	1	2	5	1	3	1	1	4	50	20	10	20	20	20	10	10	20	10	Analytic	Analytic	Analytic	Analytic	Analytic	Analytic	Analytic	Analytic	Analytic	Analytic	1	1	5	2	2	1	1
86	51	Male	england	england	england	5	5	4	4	3	3	3	3	3	2	3	5	2	3	2	2	3	60	20	10	20	10	10	5	5	5	10	Analytic	Analytic	Analytic	Analytic	Analytic	Analytic	Analytic	Analytic	Analytic	Analytic	2	3	5	3	5	2	2
87	27	Male	england	england	england	7	6	7	6	4	1	3	7	7	1	4	2	1	3	5	2	3	65	65	40	50	80	60	10	95	75	90	Holistic	Analytic	Holistic	Holistic	Holistic	Analytic	Analytic	Holistic	Holistic	Holistic	2	6	3	7	7	3	2
88	24	Male	england	england	england	3	1	3	4	2	2	3	3	2	2	2	1	2	3	2	3	3	30	30	50	10	10	15	30	40	10	40	Analytic	Analytic	Holistic	Analytic	Analytic	Analytic	Analytic	Analytic	Analytic	Analytic	2	3	4	3	5	3	2
89	23	Female	england	england	england	5	7	7	5	1	1	2	1	2	2	1	7	1	1	1	1	5	50	60	20	10	10	20	10	5	10	15	Holistic	Holistic	Analytic	Holistic	Holistic	Holistic	Analytic	Holistic	Holistic	Holistic	1	6	4	5	6	1	5
90	21	Female	england	bangladesh	bangladesh	3	3	3	4	2	3	3	3	3	2	2	3	2	2	2	2	5	30	30	10	30	10	10	10	10	10	10	Holistic	Holistic	Holistic	Holistic	Holistic	Holistic	Holistic	Holistic	Holistic	Holistic	1	1	5	3	3	1	2
91	22	Female	bangladesh	bangladesh	bangladesh	3	2	3	4	2	3	3	3	3	3	2	2	3	2	2	3	4	60	30	30	60	10	10	30	20	20	30	Analytic	Analytic	Analytic	Holistic	Holistic	Analytic	Analytic	Analytic	Analytic	Analytic	2	2	5	2	3	2	3
92	40	Female	england	england	england	3	3	3	4	2	2	2	3	2	2	2	3	2	2	2	2	4	30	20	10	20	10	5	5	5	10	5	Analytic	Analytic	Holistic	Analytic	Holistic	Holistic	Analytic	Analytic	Holistic	Holistic	2	2	6	3	3	2	3
93	19	Male	bangladesh	bangladesh	bangladesh	2	2	3	5	2	2	2	1	5	3	2	2	3	2	2	3	4	50	30	30	30	10	10	30	10	10	30	Holistic	Holistic	Holistic	Holistic	Holistic	Holistic	Holistic	Holistic	Holistic	Holistic	3	3	6	3	2	2	5
94	20	Female	bangladesh	bangladesh	bangladesh	2	2	3	3	2	2	3	3	3	3	2	2	2	2	2	2	5	50	20	20	30	20	20	20	20	20	30	Holistic	Holistic	Holistic	Holistic	Holistic	Holistic	Holistic	Holistic	Holistic	Holistic	2	2	6	3	2	2	3
95	25	Male	bangladesh	bangladesh	bangladesh	2	2	5	5	2	3	3	2	5	3	2	2	1	2	1	1	7	70	30	10	60	10	10	10	20	20	40	Holistic	Holistic	Holistic	Holistic	Holistic	Holistic	Holistic	Holistic	Holistic	Holistic	1	2	6	2	1	2	2
96	22	Female	england	bangladesh	bangladesh	2	1	3	4	2	3	2	3	3	3	4	1	3	2	2	4	5	50	30	30	50	20	20	30	30	20	30	Holistic	Holistic	Holistic	Holistic	Holistic	Holistic	Holistic	Holistic	Holistic	Holistic	4	3	4	3	4	3	2
97	48	Female	bangladesh	bangladesh	bangladesh	2	1	2	7	1	2	2	2	2	2	3	3	3	3	2	2	6	25	15	30	50	15	20	20	30	30	20	Holistic	Holistic	Holistic	Analytic	Holistic	Holistic	Holistic	Holistic	Holistic	Holistic	3	1	5	1	5	5	2
98	51	Male	england	england	england	2	1	4	3	3	1	2	1	1	4	4	4	4	2	1	2	5	75	60	50	80	60	50	93	40	60	90	Holistic	Holistic	Holistic	Holistic	Holistic	Holistic	Analytic	Holistic	Holistic	Holistic	1	2	4	4	4	4	3
99	22	Male	england	england	england	1	2	3	4	3	3	4	2	3	3	3	1	3	2	2	4	5	50	30	20	50	30	30	50	30	20	30	Holistic	Holistic	Holistic	Holistic	Holistic	Holistic	Holistic	Holistic	Holistic	Holistic	3	2	4	3	3	4	3
100	21	Male	england	bangladesh	bangladesh	3	2	2	3	2	2	2	2	3	2	2	2	2	2	2	2	4	30	30	10	30	10	10	20	20	30	20	Holistic	Holistic	Holistic	Holistic	Holistic	Holistic	Holistic	Holistic	Holistic	Holistic	2	2	6	3	3	2	3
101	55	Male	bangladesh	bangladesh	bangladesh	1	1	3	4	2	2	2	2	5	4	3	2	2	2	3	3	4	40	30	30	40	20	20	20	20	30	30	Holistic	Holistic	Holistic	Holistic	Holistic	Holistic	Holistic	Holistic	Holistic	Holistic	2	2	4	3	2	3	5
102	42	Male	bangladesh	bangladesh	bangladesh	1	1	5	5	2	2	2	1	5	3	2	1	2	2	3	2	5	50	30	30	50	30	10	30	10	10	50	Holistic	Holistic	Holistic	Holistic	Holistic	Holistic	Holistic	Holistic	Holistic	Holistic	2	2	6	4	3	2	2
103	42	Female	bangladesh	bangladesh	bangladesh	1	1	2	5	1	2	2	2	1	2	2	1	1	1	2	5	6	70	50	40	30	30	40	20	20	30	60	Holistic	Holistic	Holistic	Holistic	Holistic	Holistic	Holistic	Holistic	Holistic	Holistic	2	3	3	4	6	2	2
104	20	Male	bangladesh	bangladesh	bangladesh	3	3	3	4	3	3	3	3	5	3	3	3	2	3	2	2	3	50	20	20	30	20	20	10	10	20	20	Holistic	Holistic	Holistic	Holistic	Holistic	Holistic	Holistic	Holistic	Holistic	Holistic	2	2	5	2	1	1	1
105	42	Female	bangladesh	bangladesh	bangladesh	2	2	4	4	2	3	2	3	3	2	2	1	1	2	2	3	5	50	30	20	30	20	30	40	20	80	30	Holistic	Holistic	Holistic	Holistic	Holistic	Holistic	Analytic	Holistic	Holistic	Holistic	3	4	4	3	3	2	3
106	50	Male	england	england	england	5	4	5	6	4	3	5	3	3	1	2	5	1	2	1	1	4	60	30	10	30	10	10	10	5	10	5	Analytic	Analytic	Analytic	Analytic	Analytic	Analytic	Analytic	Analytic	Analytic	Analytic	1	1	6	3	2	1	2
107	46	Male	bangladesh	bangladesh	bangladesh	1	1	3	5	1	1	1	1	1	5	3	1	2	1	1	1	3	90	80	10	20	10	10	10	0	10	10	Holistic	Holistic	Holistic	Holistic	Holistic	Holistic	Holistic	Holistic	Holistic	Holistic	1	1	1	1	1	1	1
108	42	Female	bangladesh	bangladesh	bangladesh	1	2	2	2	1	2	2	2	4	5	5	2	4	2	2	3	5	70	70	50	50	60	60	70	70	50	50	Holistic	Holistic	Holistic	Holistic	Holistic	Holistic	Holistic	Holistic	Holistic	Holistic	2	3	6	4	2	3	3
109	30	Male				3	3	3	3	3	2	3	2	2	3	2	2	3	3	2	3	6	20	20	20	20	20	20	20	20	20	20	Holistic	Holistic	Holistic	Holistic	Holistic	Holistic	Holistic	Holistic	Holistic	Holistic	2	1	1	2	2	2	1
110	28	Male	bangladesh	bangladesh	bangladesh	3	3	5	3	5	3	3	3	3	3	3	3	2	3	3	3	4	50	20	10	10	10	10	10	10	70	10	Holistic	Holistic	Holistic	Holistic	Holistic	Holistic	Holistic	Holistic	Holistic	Holistic	3	4	3	2	3	3	3
111	29	Male	india	bangladesh	bangladesh	4	4	4	4	3	3	4	3	2	2	2	3	2	3	2	3	6	10	10	10	10	10	10	10	0	10	10	Holistic	Holistic	Holistic	Holistic	Holistic	Holistic	Holistic	Holistic	Holistic	Holistic	2	2	2	3	2	3	2
112	56	Male	pakistan	bangladesh	bangladesh	3	2	3	2	3	2	3	2	2	2	2	2	3	2	3	2	5	60	60	60	50	50	50	80	50	80	80	Holistic	Holistic	Holistic	Holistic	Analytic	Holistic	Holistic	Analytic	Holistic	Holistic	3	4	3	2	2	2	2
113	28	Female	england	england	england	2	2	2	2	3	3	2	3	3	3	3	3	4	3	4	3	3	10	10	10	10	10	10	10	10	10	10	Holistic	Analytic	Holistic	Holistic	Analytic	Holistic	Analytic	Holistic	Holistic	Holistic	3	3	3	3	2	3	2
114	41	Male	bangladesh	india	india	1	1	2	3	2	2	2	3	2	3	3	2	2	3	3	6	6	80	90	75	80	80	60	70	30	25	50	Holistic	Holistic	Holistic	Holistic	Holistic	Holistic	Holistic	Holistic	Holistic	Holistic	3	7	7	6	4	6	5
115	50	Female	bangladesh	bangladesh	bangladesh	1	1	2	7	1	1	1	1	1	1	1	2	1	1	1	1	4	50	30	10	50	40	10	30	50	50	50	Analytic	Holistic	Analytic	Holistic	Holistic	Holistic	Holistic	Holistic	Holistic	Holistic	1	2	4	2	4	2	1
116	41	Female	sweden	bangladesh	bangladesh	1	1	2	2	1	1	2	7	2	1	1	1	1	1	1	1	4	79	69	50	80	69	65	80	81	71	90	Analytic	Analytic	Analytic	Analytic	Analytic	Holistic	Analytic	Holistic	Analytic	Analytic	4	4	4	1	4	4	7
117	50	Female	bangladesh	bangladesh	bangladesh	1	1	7	7	1	1	1	4	1	1	1	1	1	7	1	1	7	60	70	20	50	20	40	80	50	40	30	Holistic	Holistic	Holistic	Holistic	Holistic	Holistic	Holistic	Holistic	Holistic	Holistic	1	1	1	1	1	7	1
118	50	Male	bangladesh	bangladesh	bangladesh	1	1	4	4	1	1	1	1	1	4	1	1	1	2	1	1	7	50	50	50	90	50	50	99	50	50	50	Analytic	Analytic	Holistic	Analytic	Holistic	Holistic	Holistic	Holistic	Holistic	Holistic	3	4	4	3	4	4	4
119	50	Female	bangladesh	bangladesh	bangladesh	1	1	2	7	1	1	1	1	NA	1	2	1	2	1	1	1	7	70	75	65	70	75	70	50	80	78	70	Analytic	Analytic	Analytic	Analytic	Analytic	Analytic	Analytic	Analytic	Analytic	Analytic	3	5	4	4	4	4	6
120	32	Female	bangladesh	bangladesh	bangladesh	1	1	7	7	1	1	1	1	1	1	1	1	1	4	1	1	7	50	50	70	80	10	10	90	50	3	50	Holistic	Holistic	Holistic	Analytic	Holistic	Holistic	Holistic	Holistic	Holistic	Holistic	4	4	4	4	4	4	4
121	28	Female	england	bangladesh	bangladesh	2	1	3	3	1	3	3	2	4	3	2	1	4	3	1	2	7	50	50	50	65	25	50	65	25	80	80	Holistic	Holistic	Holistic	Holistic	Holistic	Holistic	Holistic	Holistic	Holistic	Holistic	1	1	2	2	2	3	3
122	21	Female	england	bangladesh	bangladesh	2	2	3	3	1	2	2	3	2	1	3	2	3	2	2	3	4	40	40	20	40	20	10	40	10	20	40	Holistic	Holistic	Holistic	Holistic	Holistic	Holistic	Holistic	Holistic	Holistic	Holistic	3	2	4	3	2	4	2
123	30	Male	england	bangladesh	bangladesh	1	1	3	4	2	2	5	3	2	1	2	1	1	5	2	2	1	10	10	0	15	20	10	5	5	5	0	Holistic	Holistic	Holistic	Holistic	Holistic	Holistic	Holistic	Holistic	Holistic	Holistic	3	7	7	7	7	3	2
124	24	Male	england	bangladesh	bangladesh	2	3	6	3	2	2	6	3	3	3	2	1	2	5	3	3	6	20	30	30	40	30	10	40	50	60	40	Holistic	Holistic	Holistic	Analytic	Holistic	Holistic	Analytic	Holistic	Holistic	Holistic	2	3	5	4	2	5	3
125	18	Male	england	bangladesh	bangladesh	3	1	6	5	2	1	2	2	2	5	3	3	2	1	2	3	7	50	69	45	80	10	10	35	25	90	10	Holistic	Holistic	Holistic	Holistic	Holistic	Holistic	Holistic	Holistic	Holistic	Holistic	1	2	1	1	5	3	5
126	29	Female	england	bangladesh	bangladesh	1	1	6	3	1	1	2	1	2	2	7	2	1	2	2	3	5	70	50	70	80	80	80	70	70	70	70	Analytic	Analytic	Analytic	Analytic	Analytic	Analytic	Analytic	Analytic	Analytic	Analytic	2	2	3	2	2	2	2
127	51	Female	england	england	england	2	5	6	7	1	1	2	2	2	3	2	2	5	1	2	1	7	40	20	10	20	10	10	50	20	10	30	Holistic	Holistic	Analytic	Analytic	Holistic	Holistic	Analytic	Holistic	Holistic	Holistic	1	6	6	2	6	3	3
128	41	Female	england	england	england	1	7	7	6	1	1	2	1	2	6	6	4	1	3	2	1	3	40	40	20	50	10	20	15	15	10	70	Holistic	Holistic	Analytic	Holistic	Holistic	Holistic	Analytic	Holistic	Holistic	Holistic	2	1	7	5	5	4	2
129	45	Female	england	ireland	ireland	2	1	4	6	1	2	2	2	2	3	3	2	2	2	2	3	4	60	60	30	75	30	40	50	65	45	70	Holistic	Holistic	Holistic	Holistic	Holistic	Holistic	Holistic	Holistic	Holistic	Holistic	6	5	4	3	3	2	2
130	42	Female	england	england	england	1	1	5	5	2	2	3	2	4	2	2	2	1	2	2	1	2	50	60	30	60	30	40	10	20	50	60	Holistic	Holistic	Holistic	Holistic	Holistic	Holistic	Holistic	Holistic	Holistic	Holistic	1	3	4	5	3	2	1
131	40	Male	england	wales	england	2	1	6	4	2	3	2	3	2	2	2	5	2	2	2	3	5	35	35	20	15	3	8	10	15	10	25	Analytic	Holistic	Holistic	Analytic	Holistic	Analytic	Analytic	Analytic	Holistic	Analytic	3	3	2	4	7	2	3
132	40	Male	england	canada	england	1	1	3	4	2	2	3	2	3	1	2	5	2	1	2	1	4	25	40	30	50	20	20	40	30	20	70	Holistic	Holistic	Holistic	Holistic	Holistic	Holistic	Holistic	Holistic	Holistic	Holistic	3	3	6	2	6	3	2
133	53	Male	england	england	england	1	2	7	6	1	2	3	2	2	3	4	2	2	2	2	2	7	30	65	10	40	20	20	50	60	20	70	Holistic	Holistic	Holistic	Holistic	Holistic	Holistic	Holistic	Holistic	Holistic	Holistic	1	3	3	2	3	1	3
134	42	Male	england	england	england	1	1	3	2	1	1	2	1	2	2	2	1	2	1	1	2	6	80	80	40	85	10	5	20	40	50	60	Holistic	Holistic	Holistic	Holistic	Holistic	Holistic	Analytic	Holistic	Holistic	Holistic	1	1	4	4	6	5	1
135	30	Female	wales	wales	wales	1	1	3	1	1	1	3	2	2	3	1	2	3	2	1	3	4	50	40	60	30	20	30	20	40	20	60	Holistic	Holistic	Holistic	Holistic	Holistic	Holistic	Holistic	Holistic	Holistic	Holistic	1	3	6	3	3	5	3
136	30	Female	england	england	germany	2	2	5	6	2	1	2	2	3	3	3	5	3	2	3	5	6	50	40	30	40	35	25	40	30	25	50	Holistic	Holistic	Holistic	Analytic	Analytic	Holistic	Analytic	Holistic	Holistic	Holistic	2	7	6	3	3	3	2
137	29	Male	england	england	england	1	1	2	6	2	2	2	2	1	3	2	2	1	2	2	3	7	15	25	25	20	10	10	25	25	20	60	Holistic	Holistic	Holistic	Holistic	Holistic	Holistic	Holistic	Holistic	Holistic	Holistic	1	3	6	1	3	1	1
138	23	Female	bangladesh	bangladesh	bangladesh	1	1	2	7	1	2	3	2	4	2	2	1	2	1	2	3	2	50	50	50	50	50	50	50	50	50	50	Holistic	Holistic	Holistic	Holistic	Analytic	Holistic	Analytic	Holistic	Holistic	Holistic	1	1	4	1	1	1	1
139	19	Female	bangladesh	bangladesh	bangladesh	1	1	5	7	1	2	1	1	3	3	2	1	2	1	2	3	2	10	20	10	40	10	30	60	30	30	60	Analytic	Analytic	Holistic	Analytic	Analytic	Holistic	Analytic	Analytic	Holistic	Holistic	1	7	7	3	1	1	1
140	25	Male	bangladesh	bangladesh	bangladesh	1	1	2	7	1	1	1	2	1	1	1	1	1	3	2	1	7	99	30	50	99	30	20	40	50	80	45	Holistic	Holistic	Holistic	Analytic	Holistic	Holistic	Holistic	Holistic	Holistic	Holistic	3	3	6	7	3	5	2
141	19	Male	bangladesh	bangladesh	bangladesh	2	3	3	2	1	2	3	5	1	2	2	3	3	1	3	3	2	30	30	20	80	50	70	80	90	98	10	Holistic	Holistic	Holistic	Holistic	Holistic	Holistic	Holistic	Holistic	Holistic	Holistic	1	1	2	2	2	4	2
142	23	Male	bangladesh	bangladesh	bangladesh	1	2	2	2	1	1	1	1	2	2	4	3	1	3	1	1	3	70	50	50	50	50	50	10	50	20	20	Holistic	Holistic	Holistic	Holistic	Holistic	Holistic	Holistic	Holistic	Holistic	Holistic	1	2	4	7	7	4	1
143	28	Male	bangladesh	bangladesh	bangladesh	1	1	4	4	1	2	1	1	3	4	1	1	1	4	5	1	7	10	20	10	40	20	30	10	5	90	10	Holistic	Holistic	Holistic	Holistic	Holistic	Holistic	Holistic	Holistic	Holistic	Holistic	5	4	4	3	2	3	4
144	40	Female	england	bangladesh	bangladesh	1	1	3	3	1	1	1	2	1	2	1	1	1	1	2	1	6	70	30	0	50	0	20	10	0	0	10	Holistic	Holistic	Holistic	Holistic	Holistic	Holistic	Holistic	Holistic	Holistic	Holistic	1	3	4	3	1	1	1
145	52	Female	england	bangladesh	bangladesh	2	2	3	4	1	2	2	1	3	4	3	2	3	2	2	3	6	50	50	50	60	40	30	60	30	30	60	Holistic	Holistic	Holistic	Holistic	Holistic	Holistic	Holistic	Holistic	Holistic	Holistic	1	1	2	3	1	2	2
146	40	Female	england	pakistan	pakistan	1	1	4	4	2	4	4	1	4	2	1	2	2	2	4	1	6	0	0	0	0	0	0	0	0	0	0	Holistic	Holistic	Holistic	Holistic	Holistic	Holistic	Analytic	Analytic	Holistic	Holistic	1	1	4	1	5	3	2
147	56	Female	england	bangladesh	pakistan	2	2	7	7	1	1	1	1	7	2	6	2	7	4	1	2	4	50	50	30	30	10	5	5	10	5	10	Holistic	Holistic	Holistic	Analytic	Holistic	Holistic	Analytic	Analytic	Holistic	Holistic	2	1	4	4	2	2	1
148	22	Female	england	bangladesh	bangladesh	1	1	5	7	1	3	2	2	7	5	3	1	1	1	1	2	4	50	50	50	50	50	50	50	50	50	50	Holistic	Holistic	Holistic	Holistic	Holistic	Holistic	Holistic	Analytic	Holistic	Holistic	1	6	2	4	3	1	2
149	23	Female	england	bangladesh	bangladesh	2	1	7	5	1	2	3	2	3	1	2	2	1	1	2	2	6	70	50	80	90	20	20	80	50	50	80	Holistic	Holistic	Holistic	Holistic	Holistic	Holistic	Analytic	Holistic	Holistic	Holistic	1	3	1	3	7	4	3
150	21	Female	england	bangladesh	bangladesh	2	2	6	4	2	2	2	3	3	3	4	3	2	2	1	5	4	40	30	40	50	30	50	80	30	30	90	Holistic	Holistic	Analytic	Holistic	Holistic	Holistic	Analytic	Holistic	Holistic	Holistic	4	3	4	4	4	4	3
151	20	Male	england	bangladesh	bangladesh	3	3	4	2	1	1	2	2	3	3	2	2	3	3	1	2	3	90	90	50	80	40	50	70	80	60	90	Holistic	Holistic	Holistic	Holistic	Holistic	Holistic	Holistic	Holistic	Holistic	Holistic	1	3	5	3	6	4	2
152	19	Male	england	bangladesh	bangladesh	2	4	4	2	1	1	3	2	3	2	2	3	2	2	1	2	6	40	25	8	15	10	5	20	70	20	25	Holistic	Holistic	Analytic	Holistic	Analytic	Holistic	Analytic	Analytic	Holistic	Holistic	1	2	4	3	3	4	1
153	21	Male	england	bangladesh	bangladesh	2	3	7	4	3	3	2	2	5	2	7	1	3	3	1	4	4	60	70	50	35	75	60	40	30	50	64	Holistic	Holistic	Analytic	Holistic	Holistic	Holistic	Holistic	Holistic	Holistic	Holistic	1	2	4	5	4	3	1
154	19	Male	england	bangladesh	bangladesh	1	2	5	3	2	1	1	2	4	2	3	1	1	1	1	1	4	20	30	20	50	10	30	30	20	50	50	Holistic	Holistic	Holistic	Holistic	Holistic	Holistic	Holistic	Holistic	Holistic	Holistic	1	5	4	2	4	4	1
155	26	Female	england	england	england	5	5	2	4	1	3	3	2	1	1	1	5	1	2	1	2	7	20	20	30	20	20	20	10	10	20	20	Analytic	Analytic	Analytic	Analytic	Analytic	Analytic	Analytic	Analytic	Analytic	Holistic	1	1	1	1	1	1	1
156	18	Male	england	england	england	1	4	5	3	3	2	2	2	1	2	2	2	3	4	1	2	4	35	40	30	15	15	20	10	75	30	25	Holistic	Holistic	Holistic	Analytic	Holistic	Holistic	Holistic	Analytic	Holistic	Holistic	1	3	5	5	6	4	3
157	18	Male	england	england	england	1	2	4	2	3	2	2	2	1	1	2	1	2	3	3	3	4	35	50	25	20	15	15	35	90	20	40	Analytic	Analytic	Analytic	Analytic	Analytic	Analytic	Analytic	Analytic	Analytic	Analytic	1	2	5	6	7	2	3
158	23	Female	england	bangladesh	bangladesh	5	5	3	7	1	2	3	2	2	2	2	5	1	1	2	2	3	40	40	40	40	40	40	40	40	40	40	Holistic	Holistic	Analytic	Holistic	Holistic	Holistic	Analytic	Holistic	Holistic	Analytic	1	2	1	2	1	2	3
159	52	Male	bangladesh	bangladesh	bangladesh	1	1	3	7	1	2	1	2	3	3	3	1	3	1	3	2	4	60	30	30	30	30	30	30	20	30	60	Holistic	Holistic	Holistic	Holistic	Holistic	Holistic	Analytic	Analytic	Holistic	Analytic	1	2	3	4	1	1	1
160	38	Female	bangladesh	bangladesh	bangladesh	1	2	3	1	3	3	3	3	2	2	2	1	1	2	2	1	3	50	60	30	70	10	10	20	10	10	50	Holistic	Holistic	Analytic	Holistic	Holistic	Holistic	Analytic	Holistic	Holistic	Holistic	1	3	7	2	4	4	1
161	49	Male	bangladesh	bangladesh	bangladesh	3	2	3	2	2	5	3	3	1	3	2	2	1	3	1	1	3	60	70	40	80	50	60	70	10	50	50	Holistic	Holistic	Holistic	Holistic	Holistic	Holistic	Analytic	Holistic	Holistic	Holistic	1	2	3	1	4	4	1
162	49	Female	bangladesh	bangladesh	bangladesh	1	2	3	4	1	3	2	2	2	3	2	2	3	2	4	4	6	50	50	50	50	30	30	60	50	50	60	Holistic	Holistic	Holistic	Holistic	Holistic	Holistic	Holistic	Holistic	Holistic	Holistic	1	1	4	3	6	1	1
163	44	Female	bangladesh	bangladesh	bangladesh	1	1	2	2	2	2	1	1	1	1	1	2	1	2	1	1	4	30	40	20	20	10	12	20	20	25	15	Holistic	Holistic	Holistic	Holistic	Holistic	Holistic	Holistic	Holistic	Holistic	Holistic	1	2	3	1	3	2	1
164	56	Male	bangladesh	bangladesh	bangladesh	3	2	3	4	2	4	4	3	3	3	2	2	2	1	4	4	3	75	75	50	60	30	30	70	30	30	50	Holistic	Analytic	Analytic	Analytic	Analytic	Analytic	Analytic	Analytic	Analytic	Analytic	1	2	2	2	2	2	3
165	52	Female	bangladesh	bangladesh	bangladesh	1	1	3	7	1	2	2	2	4	2	3	1	2	1	1	2	7	50	70	50	40	20	18	50	30	17	40	Holistic	Holistic	Holistic	Analytic	Holistic	Holistic	Holistic	Holistic	Holistic	Holistic	2	4	5	4	6	3	3
166	75	Male	bangladesh	bangladesh	bangladesh	1	1	2	6	1	2	1	1	4	1	1	1	1	2	1	1	7	70	60	50	50	30	20	15	10	10	5	Holistic	Holistic	Holistic	Analytic	Holistic	Holistic	Holistic	Holistic	Holistic	Holistic	3	3	5	4	6	4	3
167	19	Female	bangladesh	bangladesh	bangladesh	1	2	3	6	1	1	1	3	3	1	2	2	1	1	2	2	1	40	30	20	40	20	20	70	50	30	40	Holistic	Holistic	Holistic	Holistic	Holistic	Holistic	Holistic	Holistic	Holistic	Holistic	1	1	2	7	3	1	1
168	59	Male	england	england	england	5	6	1	7	2	3	3	2	1	1	1	6	1	2	1	1	1	60	40	40	30	30	50	40	40	40	40	Holistic	Holistic	Holistic	Holistic	Holistic	Holistic	Holistic	Holistic	Holistic	Holistic	1	5	1	4	1	1	1
169	56	Male	england	england	england	5	6	2	4	2	3	3	3	1	1	2	6	2	1	1	1	1	60	60	40	40	30	30	30	30	40	80	Holistic	Holistic	Holistic	Holistic	Holistic	Holistic	Holistic	Holistic	Holistic	Holistic	1	7	1	3	3	1	1
170	72	Male	england	england	england	5	7	2	4	2	3	2	1	1	1	1	6	1	2	1	1	1	70	50	40	40	40	40	30	30	30	70	Holistic	Holistic	Holistic	Holistic	Holistic	Holistic	Holistic	Holistic	Holistic	Holistic	1	7	1	4	6	1	1
171	42	Female	england	england	england	2	5	5	6	1	3	4	2	1	2	2	3	1	2	1	1	2	80	40	40	40	40	30	40	20	20	70	Holistic	Holistic	Holistic	Holistic	Holistic	Holistic	Holistic	Holistic	Holistic	Holistic	1	7	1	1	2	1	1
172	52	Male	england	england	england	6	6	2	7	2	3	2	2	1	2	2	6	1	3	1	1	2	75	45	30	30	30	40	40	30	30	70	Holistic	Holistic	Holistic	Holistic	Holistic	Holistic	Holistic	Holistic	Holistic	Holistic	1	3	2	4	4	1	1
173	46	Female	wales	wales	wales	2	2	1	2	2	2	2	3	1	2	1	2	1	2	1	2	5	60	40	40	30	30	30	20	20	20	60	Holistic	Holistic	Holistic	Holistic	Holistic	Holistic	Holistic	Holistic	Holistic	Holistic	1	1	2	4	1	1	1
174	65	Female	england	england	england	3	3	2	4	2	3	3	2	1	1	1	3	1	2	1	2	2	50	50	30	30	50	50	20	10	40	30	Holistic	Holistic	Holistic	Holistic	Holistic	Holistic	Holistic	Holistic	Holistic	Holistic	1	2	4	3	3	1	1
175	67	Female	england	england	england	3	2	4	4	3	3	4	4	2	2	2	3	3	2	3	2	2	70	70	30	20	20	30	60	30	70	20	Holistic	Holistic	Holistic	Holistic	Holistic	Analytic	Analytic	Analytic	Analytic	Holistic	1	2	4	4	4	2	1
176	28	Female	england	england	england	1	1	5	5	1	2	2	1	3	2	2	2	3	2	2	2	7	40	20	30	30	20	10	20	20	20	30	Holistic	Holistic	Holistic	Analytic	Holistic	Holistic	Analytic	Holistic	Holistic	Holistic	3	4	6	4	3	3	3
177	23	Female	england	england	england	1	1	6	4	1	2	2	2	5	3	5	1	5	2	2	5	5	50	50	50	50	40	40	50	50	50	50	Holistic	Holistic	Holistic	Analytic	Holistic	Holistic	Analytic	Holistic	Holistic	Holistic	3	3	5	4	4	3	3
178	23	Female	england	england	england	2	7	7	3	1	1	1	4	7	1	3	4.5	1	2	1	1	2	70	60	50	50	30	30	50	50	40	40	Holistic	Holistic	Holistic	Holistic	Holistic	Holistic	Analytic	Analytic	Holistic	Holistic	2	1	4	2	7	1	1
179	22	Male	england	england	england	2	3	4	3	3	2	4	2	3	2	1	4	1	1	1	2	6	40	25	50	20	10	30	5	30	10	30	Holistic	Holistic	Holistic	Holistic	Holistic	Holistic	Holistic	Holistic	Holistic	Holistic	2	2	5	4	7	4	3
180	30	Male	england	england	england	1	1	5	5	2	2	3	3	3	2	1	2	2	1	2	5	3	50	30	90	10	20	50	50	60	40	10	Analytic	Analytic	Analytic	Analytic	Analytic	Holistic	Analytic	Analytic	Analytic	Holistic	1	7	3	7	7	1	1
181	46	Female	england	jamaica	jamaica	6	5	6	3	2	1	3	2	6	3	3	5	6	3	1	6	2	20	50	70	50	20	60	70	70	70	70	Analytic	Analytic	Analytic	Analytic	Analytic	Analytic	Analytic	Analytic	Holistic	Analytic	1	1	2	2	6	1	2
182	27	Male	uk	england	england	3	2	7	5	2	1	2	2	6	2	2	5	3	5	5	2	7	50	25	5	30	50	10	15	10	20	50	Holistic	Holistic	Holistic	Holistic	Holistic	Holistic	Analytic	Holistic	Holistic	Holistic	2	3	4	3	5	3	1
183	34	Male	uk	spain	spain	1	4	6	6	2	2	3	2	6	2	6	2	3	1	7	5	4	50	30	40	30	50	30	60	60	50	30	Holistic	Holistic	Holistic	Analytic	Holistic	Holistic	Analytic	Analytic	Holistic	Holistic	2	5	5	3	7	3	2
184	26	Female	england	bangladesh	bangladesh	1	1	3	4	1	1	1	1	4	2	4	1	1	1	4	2	4	50	50	50	50	50	30	50	50	50	50	Holistic	Holistic	Holistic	Holistic	Holistic	Holistic	Holistic	Holistic	Holistic	Holistic	1	4	3	1	1	2	1
185	44	Female	uk	india	india	1	1	4	4	1	1	1	1	1	1	1	1	1	1	1	1	6	50	50	1	9	60	30	7	80	12	10	Analytic	Holistic	Holistic	Analytic	Holistic	Holistic	Analytic	Holistic	Holistic	Holistic	1	1	4	4	4	1	1
186	47	Female	bangladesh	bangaldesh	bangladesh	1	1	5	4	2	6	3	2	3	3	1	1	1	1	1	1	7	25	17	14	18	7	7	8	10	16	20	Holistic	Neither	Holistic	Holistic	Holistic	Holistic	Analytic	Holistic	Holistic	Holistic	1	2	6	3	2	2	2
187	32	Male	bangladesh	bangladesh	bangladesh	1	1	6	2	1	1	1	1	1	1	1	4	1	7	1	1	7	50	60	50	70	10	90	40	75	80	60	Holistic	Holistic	Holistic	Holistic	Holistic	Holistic	Holistic	Holistic	Holistic	Holistic	1	1	1	1	7	7	1
188	NA	NA				4	4	7	7	3	3	3	2	2	2	4	5	1	5	3	6	1	50	50	50	50	50	50	50	50	50	50	Holistic	Holistic	Holistic	Holistic	Holistic	Holistic	Holistic	Holistic	Holistic	Holistic	5	5	6	3	5	4	4
189	18	Female	england	england	algeria	5	6	7	3	3	3	5	4	2	1	2	6	2	2	2	1	4	45	40	60	40	35	40	30	50	35	45	Holistic	Holistic	Holistic	Holistic	Analytic	Analytic	Holistic	Holistic	Holistic	Analytic	1	2	7	3	4	3	2
190	26	Female	bangladesh	uk	us	1	1	7	4	3	3	3	4	7	4	4	3	4	1	3	4	2	40	50	40	40	30	50	75	40	50	30	Holistic	Holistic	Holistic	Holistic	Holistic	Holistic	Holistic	Holistic	Holistic	Holistic	2	1	4	3	4	2	2
191	44	Male	uk	uk	uk	1	2	6	4	2	2	2	2	3	2	4	2	3	3	2	3	5	50	60	40	40	30	60	40	50	30	60	Holistic	Holistic	Analytic	Analytic	Holistic	Holistic	Analytic	Holistic	Holistic	Holistic	1	2	2	2	6	2	1
192	21	Female	england	bangladesh	bangladesh	1	1	5	6	1	2	2	2	3	3	3	2	3	2	2	5	4	30	65	20	30	10	15	75	25	60	75	Holistic	Holistic	Holistic	Holistic	Holistic	Holistic	Holistic	Holistic	Holistic	Holistic	1	5	4	4	5	2	1
193	40	Male	bangladesh	bengladesh	bangladesh	5	2	2	4	4	1	1	1	3	2	2	4	1	2	1	5	5	10	16	5	20	5	10	10	10	10	5	Holistic	Holistic	Holistic	Analytic	Holistic	Holistic	Analytic	Holistic	Analytic	Holistic	4	7	7	4	4	4	4
194	33	Female	bangladesh	bangladesh	bangladesh	2	1	3	3	2	2	2	1	3	1	2	2	1	2	1	1	1	50	90	90	0	20	20	20	50	20	20	Holistic	Holistic	Holistic	Holistic	Holistic	Holistic	Analytic	Holistic	Holistic	Holistic	3	3	4	4	2	2	2
195	18	Male	pakistan	pakistan	pakistan	2	6	7	6	1	1	3	2	2	2	2	4	3	1	1	1	5	70	30	30	50	50	20	55	60	40	70	Holistic	Holistic	Holistic	Neither	Analytic	Analytic	Analytic	Holistic	Holistic	Analytic	1	3	3	4	5	2	2
196	27	Male	england	england	england	2	1	7	7	1	1	1	1	4	2	4	2	4	2	2	1	7	50	70	70	90	5	10	5	30	50	60	Holistic	Holistic	Holistic	Analytic	Holistic	Holistic	Holistic	Holistic	Holistic	Holistic	2	4	7	7	2	2	4
197	42	Female	england	ireland	england	1	2	5	6	4	2	2	3	5	3	3	3	3	2	3	4	7	50	50	50	50	50	50	50	50	50	50	Holistic	Holistic	Holistic	Holistic	Holistic	Holistic	Analytic	Holistic	Holistic	Holistic	7	7	1	4	4	4	6
198	21	Male	uk	bangladesh	bangaldesh	2	2	2	3	3	2	4	2	2	3	3	4	2	3	3	2	4	50	60	25	30	25	20	60	50	40	50	Holistic	Holistic	Holistic	Analytic	Holistic	Holistic	Holistic	Holistic	Holistic	Holistic	1	2	5	3	3	4	4
199	57	Male	bangladesh	bangladesh	bangladesh	1	1	4	7	1	1	1	1	1	1	1	1	1	1	1	1	3	10	20	50	50	5	10	50	30	30	30	Analytic	Analytic	Analytic	Analytic	Analytic	Analytic	Analytic	Analytic	Analytic	Analytic	1	4	7	2	3	1	4
200	26	Male	uk	bangladesh	bangladesh	1	1	3	3	1	1	2	1	2	1	2	1	1	1	1	1	7	75	40	30	50	20	20	40	30	30	30	Holistic	Holistic	Holistic	Analytic	Holistic	Holistic	Analytic	Holistic	Holistic	Holistic	1	1	4	1	2	2	1
201	NA	NA				5	3	6	5	7	7	5	6	7	5	7	7	7	7	7	6	3	90	95	50	80	30	30	98	80	60	70	Holistic	Holistic	Holistic	Holistic	Holistic	Holistic	Holistic	Holistic	Holistic	Holistic	6	7	2	5	4	6	5
202	25	Male	england	england	england	1	2	6	6	2	2	3	2	3	4	3	3	4	1	3	4	5	30	30	10	20	20	20	20	20	10	30	Holistic	Holistic	Holistic	Holistic	Holistic	Holistic	Holistic	Holistic	Holistic	Holistic	1	3	3	4	3	5	3
203	56	Male	england	england	england	2	5	7	6	1	1	2	4	6	2	6	3	2	2	1	3	4	10	5	10	3	5	20	20	10	3	5	Holistic	Holistic	Analytic	Analytic	Holistic	Holistic	Analytic	Holistic	Holistic	Holistic	1	4	7	2	6	2	2
204	29	Female	england	bangladesh	bangladesh	1	1	7	7	1	1	1	1	2	1	1	1	1	1	1	1	7	0	0	NA	NA	NA	NA	NA	NA	NA	NA	Holistic	Holistic	Holistic	Analytic	Holistic	Holistic	Analytic	Holistic	Holistic	Holistic	1	1	4	4	NA	NA	NA
205	40	Female	bangladesh	bangladesh	bangladesh	1	1	6	4	2	2	2	2	4	1	4	4	2	4	1	3	6	0	30	50	31	5	40	35	45	45	40	Holistic	Holistic	Holistic	Holistic	Holistic	Neither	Holistic	Holistic	Holistic	Analytic	1	4	6	4	7	2	3
206	58	Female	bangladesh	bangladesh	bangladesh	1	2	4	6	1	2	1	1	4	1	3	4	1	1	2	1	4	50	60	30	50	40	30	10	10	20	50	Holistic	Holistic	Holistic	Holistic	Holistic	Holistic	Holistic	Holistic	Holistic	Holistic	3	2	5	4	5	3	1
207	40	Female	bangladesh	bangladesh	bangladesh	4	5	6	5	3	1	1	4	3	3	6	6	3	4	2	4	6	25	10	10	50	50	25	10	15	10	20	Holistic	Holistic	Analytic	Holistic	Holistic	Analytic	Analytic	Holistic	Holistic	Analytic	4	3	7	1	3	1	2
208	53	Female	bangladesh	bangladesh	bangladesh	1	1	6	3	1	1	1	1	2	1	1	1	1	1	1	1	2	50	50	30	50	20	20	10	50	30	50	Holistic	Holistic	Neither	Holistic	Holistic	Holistic	Holistic	Holistic	Holistic	Holistic	2	1	2	1	3	1	1
209	18	Male	jamaica	jamaica	jamaica	2	2	3	3	1	2	1	1	1	4	3	1	1	2	1	1	4	50	60	20	30	30	20	30	20	40	50	Holistic	Holistic	Holistic	Holistic	Holistic	Holistic	Holistic	Holistic	Holistic	Holistic	2	3	6	7	3	4	2
210	25	Female	england	ireland	england	2	3	7	6	1	1	1	1	6	2	6	3	4	2	3	5	4	60	40	40	65	35	35	40	75	65	50	Holistic	Holistic	Holistic	Holistic	Holistic	Holistic	Holistic	Holistic	Holistic	Holistic	5	3	7	3	3	2	3
211	57	Female	uk		wales	1	2	2	5	1	1	1	1	2	3	1	NA	2	1	2	2	7	50	20	50	20	40	50	30	40	30	30	Neither	Holistic	Holistic	Analytic	Holistic	Holistic	Holistic	Holistic	Holistic	Holistic	1	1	1	1	4	6	1
212	44	Female	bangladesh	bangladesh	bangladesh	1	1	5	5	2	1	1	1	4	1	1	1	1	1	1	1	7	29	10	1	2	1	80	90	1	9	1	Holistic	Holistic	Holistic	Analytic	Holistic	Neither	Holistic	Holistic	Holistic	Holistic	4	4	4	4	5	4	3
213	45	Male	bangladesh	bangladesh	bangladesh	1	2	2	5	1	1	1	2	3	2	2	1	2	2	1	3	6	30	30	30	50	30	30	50	30	30	30	Holistic	Holistic	Neither	Holistic	Holistic	Holistic	Analytic	Holistic	Holistic	Holistic	2	2	4	5	3	2	1
214	24	Female	uk	uk	uk	2	5	7	6	3	2	2	3	7	1	2	6	5	3	3	2	2	70	50	10	20	50	20	10	60	40	30	Holistic	Holistic	Analytic	Analytic	Holistic	Holistic	Analytic	Holistic	Holistic	Holistic	1	5	6	7	5	3	4
215	50	Female	uk	uk	uk	2	2	7	4	1	1	1	1	7	4	7	3	6	1	1	7	3	75	50	40	50	50	30	40	50	30	30	Holistic	Holistic	Holistic	Holistic	Holistic	Holistic	Holistic	Holistic	Holistic	Holistic	1	5	7	7	7	3	3
216	41	Female	bangladesh	bangladesh	bangladesh	2	1	6	7	1	2	2	1	NA	1	3	1	1	4	NA	4	1	50	50	40	60	50	30	50	20	50	60	Holistic	Holistic	Holistic	Analytic	Holistic	Neither	Holistic	Holistic	Holistic	Holistic	7	2	4	4	4	2	4
217	42	Female	bangladesh	bangladesh	bangladesh	2	2	6	3	1	1	1	1	3	2	1	1	2	2	1	2	5	20	40	10	10	5	5	30	30	10	20	Analytic	Holistic	Neither	Analytic	Holistic	Holistic	Analytic	Holistic	Holistic	Holistic	1	3	3	2	3	2	3
218	19	Female	england	england	england	1	3	6	6	2	3	3	3	6	3	4	3	3	3	3	3	5	72	70	40	40	40	30	50	40	30	50	Holistic	Holistic	Holistic	Analytic	Holistic	Holistic	Holistic	Holistic	Holistic	Holistic	2	2	4	3	3	3	3
219	32	Female	uk	uk	uk	2	3	4	3	2	1	1	2	4	2	4	2	6	4	2	1	5	80	70	80	80	50	40	50	40	40	85	Holistic	Holistic	Holistic	Analytic	Holistic	Holistic	Holistic	Holistic	Holistic	Analytic	3	4	7	4	4	4	4
220	19	Female	england	england	iraq	1	3	6	4	2	2	2	2	5	3	4	3	3	2	1	5	6	60	60	60	70	40	30	60	70	50	80	Holistic	Holistic	Holistic	Analytic	Holistic	Holistic	Holistic	Holistic	Holistic	Holistic	2	3	4	2	3	2	2
221	39	Male	england	england	england	1	2	7	3	1	1	1	1	2	3	2	4	1	3	3	4	2	50	50	20	70	40	40	90	70	50	90	Holistic	Holistic	Analytic	Analytic	Holistic	Holistic	Analytic	Holistic	Holistic	Analytic	1	7	7	3	5	2	2
222	18	Male	uk	bangladesh	bangladesh	6	2	4	7	3	2	2	3	4	2	1	3	1	1	1	2	3	99	1	13	0	0	3	35	10	40	0	NA	NA	Holistic	NA	NA	NA	NA	NA	NA	NA	1	3	5	2	3	5	3
223	18	Female	england	england	england	2	4	7	3	3	1	1	1	5	3	3	1	3	1	2	2	7	70	70	60	90	30	30	90	30	20	99	Holistic	Holistic	Holistic	Holistic	Holistic	Holistic	Holistic	Holistic	Holistic	Holistic	2	3	6	7	4	3	1
224	42	Female	england	england	england	1	2	7	3	2	1	1	2	1	2	5	3	5	1	1	3	1	30	30	20	20	5	5	20	2	5	40	Holistic	Holistic	Holistic	Holistic	Holistic	Holistic	Holistic	Analytic	Holistic	Holistic	1	3	7	1	4	1	1
225	26	Male	uk	bangladesh	bangladesh	2	2	4	3	2	4	3	4	3	2	4	4	3	5	3	2	5	18	21	25	19	28	35	10	40	20	50	Holistic	Holistic	Holistic	Holistic	Analytic	Analytic	Holistic	Analytic	Holistic	Holistic	4	2	3	4	3	3	4
226	24	Female	bangladesh	bangladesh	bangladesh	2	1	7	6	1	3	2	2	2	3	1	2	1	2	1	6	4	70	80	10	90	0	60	70	80	20	70	Holistic	Holistic	Neither	Holistic	Holistic	Holistic	Holistic	Holistic	Holistic	Holistic	7	2	3	4	5	2	2
227	18	Female	england	england	england	2	2	6	7	2	1	2	2	5	3	5	3	4	2	3	5	5	80	90	70	95	80	90	95	75	80	90	Holistic	Analytic	Analytic	Analytic	Holistic	Analytic	Analytic	Holistic	Holistic	Holistic	1	2	4	1	2	3	1
228	19	Female	england	bangaldesh	bangladesh	1	2	4	5	2	2	3	3	2	3	2	1	1	3	1	3	6	20	20	20	20	15	10	16	22	30	30	Holistic	Holistic	Holistic	Analytic	Holistic	Holistic	Holistic	Holistic	Holistic	Holistic	1	3	5	6	2	2	4
229	18	Female	england	england	england	3	1	5	5	2	2	4	2	1	3	2	1	5	2	3	5	4	47	82	73	41	37	62	37	43	63	79	Analytic	Holistic	Holistic	Holistic	Holistic	Holistic	Analytic	Holistic	Holistic	Holistic	1	3	4	5	3	5	2
230	21	Male	uk	bangladesh	bangaldesh	5	3	4	5	2	2	2	1	3	4	3	2	2	3	4	3	4	60	50	70	40	50	50	70	60	60	80	Holistic	Holistic	Holistic	Holistic	Holistic	Neither	Analytic	Holistic	Holistic	Holistic	6	4	4	4	4	3	4
231	20	Female	kenya	africa	africa	1	1	3	6	2	2	1	2	6	1	4	1	1	2	1	3	4	50	50	50	50	50	50	50	50	50	50	Holistic	Holistic	Holistic	Holistic	Holistic	Holistic	Holistic	Holistic	Holistic	Holistic	2	3	2	3	4	4	4
232	27	Female	england	czech republic	ghana	6	5	7	3	2	4	4	3	7	3	3	7	3	3	1	5	3	30	30	60	10	50	70	50	80	50	50	Holistic	Holistic	Holistic	Holistic	Holistic	Holistic	Analytic	Analytic	Holistic	Holistic	2	1	7	1	7	1	3
233	52	Male	uk	uk	uk	4	4	7	4	1	1	2	4	2	1	2	3	1	2	2	1	5	60	20	20	20	40	40	10	70	30	40	Holistic	Holistic	Analytic	Analytic	Holistic	Holistic	Holistic	Holistic	Holistic	Holistic	1	6	4	2	4	3	1
234	25	Male	england	bangladesh	bangladesh	1	4	4	4	2	3	4	3	3	3	3	3	3	3	4	4	4	25	25	20	30	1	50	50	60	50	40	Holistic	Holistic	Holistic	Analytic	Holistic	Holistic	Holistic	Holistic	Holistic	Holistic	1	2	1	2	5	2	5
235	31	Female	england	india	britain	2.5	2.5	4	6	3.5	2	2	2	4	5	4	4	2	4	3	4	NA	NA	NA	NA	NA	NA	NA	NA	NA	NA	NA	Holistic	Holistic	NA	Analytic	Holistic	Holistic	Holistic	Holistic	Holistic	Holistic	2	2	4	3	4	2	2
236	38	Female	bangladesh	bangladesh	bangladesh	2	1	3	3	1	1	1	1	NA	1	2	1	1	1	1	3	5	NA	NA	NA	NA	NA	NA	NA	NA	NA	NA	Analytic	Analytic	Analytic	Holistic	Holistic	Holistic	Analytic	Holistic	Holistic	Holistic	2	2	2	2	2	2	2
237	50	Male	bangladesh	bangladesh	bangladesh	2	2	3	2	3	2	2	3	NA	NA	NA	NA	NA	NA	NA	NA	6	30	40	35	25	16	20	15	35	40	20	Holistic	Holistic	Holistic	Holistic	Holistic	Holistic	Analytic	Analytic	Analytic	Holistic	2	1	3	3	3	4	4
238	50	Male	bangladesh	bangladesh	italy	2	1	3	3	1	5	5	4	1	2	1	1	2	5	1	1	7	50	30	20	50	50	45	60	25	55	40	Holistic	Holistic	Holistic	Holistic	Holistic	Analytic	Holistic	Neither	Holistic	Holistic	2	3	5	2	1	3	3
239	19	Female	england	england	england	1	3	7	3	2	1	3	3	1	2	2	2	3	1	1	5	1	80	70	60	30	30	10	40	30	40	80	Holistic	Analytic	Holistic	Holistic	Holistic	Holistic	Neither	Holistic	Holistic	Holistic	2	3	7	3	3	2	4
240	25	Male	england	bangladesh	bangladesh	3	1	2	3	2	1	2	2	2	3	4	1	1	2	2	3	6	50	40	50	30	20	30	25	40	50	60	Holistic	Holistic	Holistic	Analytic	Analytic	Analytic	Analytic	Analytic	Holistic	Holistic	3	4	1	5	2	2	4
241	18	Male	england	england	england	1	4	5	7	1	1	3	2	4	1	3	1	2	2	3	2	4	35	30	70	20	40	50	30	20	40	50	Holistic	Holistic	Holistic	Analytic	Holistic	Holistic	Analytic	Holistic	Holistic	Holistic	1	3	5	3	7	6	2
242	24	Male	england	bangladesh	bangladesh	1	1	5	4	4	1	1	1	4	3	1	1	1	3	1	3	6	98	90	90	100	0	30	40	10	10	70	Holistic	Holistic	Holistic	Analytic	Holistic	Holistic	Analytic	Holistic	Holistic	Holistic	3	3	4	2	4	4	2
243	19	Female	uk	uk	uk	4	2	4	7	2	2	3	3	4	2	3	4	2	2	2	2	3	50	60	50	50	50	50	50	50	50	70	Holistic	Holistic	Holistic	Holistic	Holistic	Holistic	Holistic	Holistic	Holistic	Holistic	2	5	7	4	4	3	1
244	25	Male	england	bangladesh	bangladesh	2	1	2	7	2	2	3	2	1	2	2	2	1	3	2	1	5	50	50	50	50	50	50	50	50	50	50	Analytic	Holistic	Holistic	Analytic	Holistic	Holistic	Holistic	Holistic	Holistic	Holistic	4	4	4	4	4	4	4
245	19	Female	england	england	england	1	5	7	7	2	1	2	2	2	3	4	4	3	1	4	6	3	86	48	52	56	49	48	72	54	58	73	Analytic	Holistic	Holistic	Holistic	Holistic	Holistic	Analytic	Holistic	Holistic	Holistic	2	3	4	5	4	5	5
246	25	Male	england	england	england	2	2	4	6	2	1	2	3	2	4	2	4	3	2	2	4	5	30	10	20	30	10	10	20	20	30	30	Holistic	Holistic	Holistic	Holistic	Holistic	Holistic	Holistic	Holistic	Holistic	Holistic	2	1	5	1	2	3	2
247	24	Female	uk	bangladesh	bangladesh	1	2	4	5	1	2	1	2	3	6	5	3	5	2	5	6	5	50	49	60	71	82	50	30	40	10	17	Holistic	Holistic	Holistic	Holistic	Holistic	Analytic	Analytic	Holistic	Holistic	Holistic	2	2	4	2	3	4	3
248	18	Female	england	england	england	2	3	6	3	3	3	4	4	3	4	3	2	2	1	2	2	4	50	60	70	40	10	20	80	50	30	70	Analytic	Analytic	Analytic	Analytic	Analytic	Analytic	Analytic	Analytic	Analytic	Analytic	1	2	5	4	6	6	1
249	25	Male	uk	bangladesh	bangladesh	3	3	5	6	4	4	4	4	7	3	4	4	4	1	5	7	5	80	80	80	80	80	80	80	80	80	80	Analytic	Analytic	Holistic	Analytic	Holistic	Analytic	Analytic	Analytic	Analytic	Analytic	1	4	4	2	4	3	3
250	19	Male	england	england	england	1	2	6	6	1	1	2	2	3	2	4	2	2	1	1	5	4	50	10	10	5	30	10	50	50	20	40	Holistic	Holistic	Holistic	Analytic	Holistic	Holistic	Analytic	Holistic	Holistic	Holistic	2	4	6	1	7	2	2
251	21	Female	england	bangladesh	bangaldesh	2	1	5	6	2	2	1	1	3	2	2	1	2	2	1	2	3	55	60	45	49	20	10	30	49	40	45	Holistic	Holistic	Analytic	Analytic	Holistic	Holistic	Analytic	Holistic	Holistic	Holistic	2	3	7	7	7	3	1
252	18	Female	england	england	england	4	2	5	7	2	2	2	2	7	6	4	4	3	2	2	4	6	50	50	50	50	50	50	50	50	50	50	Analytic	Holistic	Holistic	Holistic	Holistic	Holistic	Analytic	Holistic	Holistic	Holistic	3	4	4	3	4	3	3
253	20	Male	england	bangladesh	bangladesh	1	1	5	6	1	1	1	1	3	4	3	1	5	2	3	3	6	50	50	30	30	20	20	20	20	60	50	Analytic	Holistic	Analytic	Analytic	Holistic	Holistic	Analytic	Analytic	Analytic	Holistic	1	7	7	3	3	3	3
254	18	Female	uk	uk	uk	5	2	7	6	3	2	4	5	4	3	6	3	5	1	2	5	5	40	50	60	40	50	50	60	65	50	60	Analytic	Holistic	Analytic	Analytic	Holistic	Analytic	Neither	Neither	Holistic	Holistic	2	4	5	2	4	4	3
255	18	Male	england	england	england	2	2	2	5	4	3	4	3	4	2	2	2	3	4	4	2	6	40	45	60	65	20	70	15	50	60	30	Holistic	Holistic	Holistic	Analytic	Holistic	Holistic	Holistic	Holistic	Holistic	Holistic	1	2	3	2	7	1	1
256	29	Female	uk	uk	uk	3	2	3	4	2	2	2	2	3	4	3	4	3	4	4	3	5	40	40	40	50	50	40	60	40	40	40	Holistic	Holistic	Holistic	Holistic	Holistic	Holistic	Holistic	Holistic	Holistic	Holistic	3	4	3	4	4	4	3
257	NA	Female	england	india	india	1	1	1	1	11	1	1	1	2	1	1	1	1	1	1	1	2	50	90	90	50	60	75	50	90	50	90	Holistic	Holistic	Holistic	Analytic	Holistic	Holistic	Analytic	Holistic	Holistic	Holistic	1	1	3	2	3	3	2
258	23	Male	england	spain	england	2	3	7	7	2	1	4	1	3	1	6	5	1	2	1	2	5	45	25	10	35	10	15	20	35	30	25	Holistic	Holistic	Holistic	Holistic	Holistic	Holistic	Holistic	Holistic	Holistic	Holistic	4	5	4	3	6	3	3
259	43	Male	england	england	england	3	3	6	5	2	3	3	3	2	1	2	2	1	3	2	1	2	50	50	35	35	50	50	35	50	50	35	Holistic	Holistic	Holistic	Holistic	Holistic	Holistic	Holistic	Holistic	Holistic	Holistic	2	2	5	3	3	1	1
260	31	Male	england	bangladesh	bangladesh	1	1	2	7	2	2	1	1	2	1	1	1	1	5	1	1	7	50	35	50	40	50	50	50	50	50	50	Holistic	Holistic	Analytic	Analytic	Holistic	Holistic	Holistic	Holistic	Holistic	Holistic	1	2	7	1	3	2	1
261	44	Male	bangladesh	bangladesh	bangladesh	1	1	3	4	5	2	4	2	2	2	3	2	2	4	2	1	6	50	40	70	30	10	20	40	5	20	40	Holistic	Holistic	Holistic	Holistic	Holistic	Neither	Analytic	Holistic	Holistic	Holistic	4	2	5	3	3	5	6
262	48	Female	bangladesh	bangaldesh	bangladesh	3	3	2	2	3	2	2	2	3	3	2	2	3	3	2	2	6	50	60	50	40	50	45	30	25	50	50	Holistic	Holistic	Holistic	Holistic	Analytic	Analytic	Holistic	Holistic	Holistic	Holistic	3	3	2	3	4	4	3
263	18	Female	uk	uk	uk	2	2	7	7	2	1	2	2	1	1	2	1	1	5	1	1	4	95	80	50	90	20	50	20	50	50	20	Holistic	Holistic	Holistic	Holistic	Holistic	Holistic	Analytic	Analytic	Holistic	Holistic	1	1	7	3	2	7	1
264	35	Male	uk	bangladesh	bangladesh	2	2	5	6	1	3	2	4	5	2	4	5	2	3	1	2	5	30	20	30	20	30	30	50	50	40	30	Holistic	Holistic	Holistic	Holistic	Holistic	Holistic	Holistic	Holistic	Holistic	Holistic	3	2	3	1	7	3	3
265	18	Female	england	england	england	2	3	5	6	3	4	4	3	4	3	4	3	2	3	3	3	7	90	60	45	95	20	30	50	40	50	90	Holistic	Holistic	Holistic	Analytic	Holistic	Holistic	Holistic	Holistic	Holistic	Holistic	2	3	4	4	4	4	3
266	30	Female	uki	bangladesh	bangladesh	2	2	4	4	3	3	3	3	2	3	3	2	2	2	1	1	5	80	80	60	70	50	50	60	60	60	70	Holistic	Holistic	Holistic	Holistic	Holistic	Holistic	Holistic	Holistic	Holistic	Holistic	1	4	6	5	5	1	2
267	18	Male	england	england	england	2	2	3	4	3	4	5	2	2	3	2	2	1	4	3	1	6	40	30	60	40	20	70	20	20	20	10	Holistic	Holistic	Holistic	Holistic	Holistic	Holistic	Analytic	Analytic	Holistic	Analytic	2	4	6	2	3	4	5
268	18	Male	england	england		3	4	7	3	1	4	2	3	3	2	1	6	1	1	1	2	5	60	50	60	70	20	20	40	70	40	70	Holistic	Holistic	Holistic	Holistic	Holistic	Holistic	Holistic	Holistic	Holistic	Holistic	2	3	5	4	4	6	2
269	38	Male	ghana	ghana	ghana	1	1	4	5	2	2	2	1	4	3	7	3	3	6	4	6	5	10	7	45	50	45	40	65	30	20	50	Holistic	Holistic	Holistic	Holistic	Holistic	Holistic	Holistic	Holistic	Holistic	Holistic	2	2	5	4	7	4	3
270	21	Male	uk	uk	uk	2	5	6	1	2	3	6	3	7	1	1	3	1	1	1	5	5	45	13	30	23	63	35	72	50	10	25	Holistic	Analytic	Holistic	Holistic	Analytic	Holistic	Analytic	Holistic	Holistic	Analytic	1	3	7	2	3	1	2
271	33	Male	britain	britain	britain	3	5	6	2	4	3	4	4	5	2	1	2	1	2	2	2	4	50	50	40	40	60	50	40	35	40	40	Holistic	Holistic	Analytic	Holistic	Analytic	Analytic	Holistic	Holistic	Holistic	Holistic	3	5	4	4	4	3	3
272	25	Male	uk	bangladesh	bangladesh	1	2	4	6	2	1	3	6	2	5	1	1	3	2	3	2	4	40	20	1	20	10	80	50	1	15	40	Analytic	Analytic	Analytic	Analytic	Analytic	Analytic	Analytic	Analytic	Analytic	Analytic	7	3	2	6	3	3	6
273	40	Female	bangladesh	bangladesh	bangaldesh	3	2	3	5	2	5	2	5	4	3	2	2	3	3	2	3	7	50	40	30	20	10	10	10	10	10	10	Holistic	Holistic	Holistic	Neither	Analytic	Analytic	Holistic	Analytic	Holistic	Holistic	3	4	3	3	4	3	4
274	64	Male	bangladesh	bangladesh	bangladesh	1	2	1	3	2	1	1	7	1	1	1	1	1	2	4	2	7	50	50	50	50	50	50	50	50	50	50	Holistic	Holistic	Holistic	Neither	Holistic	Holistic	Neither	Holistic	Holistic	Holistic	1	1	1	4	1	7	1
275	24	Female	poland	poland	poland	2	4	6	3	2	3	3	3	5	2	4	5	1	2	2	2	2	60	40	50	40	50	50	60	80	60	70	Analytic	Analytic	Analytic	Analytic	Analytic	Analytic	Analytic	Analytic	Holistic	Analytic	2	2	5	3	5	4	2
276	25	Male	bangladesh	bangladesh	bangladesh	1	2	4	4	2	2	2	2	4	3	4	2	1	4	4	3	5	50	50	50	50	50	50	50	50	50	50	Analytic	Analytic	Analytic	Analytic	Analytic	Analytic	Analytic	Analytic	Analytic	Analytic	3	2	4	3	4	3	3
277	63	Female	bangladesh	bangladesh	bangaldesh	1	1	1	5	2	2	3	1	4	4	1	1	3	1	3	1	7	50	50	50	50	50	50	50	50	50	50	Holistic	Holistic	Holistic	Neither	Holistic	Neither	Holistic	Holistic	Holistic	Holistic	3	3	1	1	1	7	1
278	28	Female	england	bangladesh	bangladesh	2	2	4	5	1	3	2	3	3	2	2	3	4	2	1	3	4	50	19	20	40	55	35	19	24	30	50	Holistic	Holistic	Holistic	Holistic	Holistic	Analytic	Holistic	Holistic	Holistic	Holistic	4	3	3	4	3	3	4
279	35	Female	bangladesh	bangladesh	bangladesh	1	3	7	7	1	3	1	1	7	4	5	2	7	7	3	5	4	50	50	50	50	50	50	50	50	50	50	Holistic	Holistic	Holistic	Holistic	Holistic	Holistic	Holistic	Holistic	Holistic	Holistic	1	1	1	1	7	7	1
280	22	Female	china	china	china	5	7	4	3	3	1	1	1	2	5	3	6	3	2	2	2	3	80	80	80	40	90	90	20	20	20	40	Analytic	Analytic	Holistic	Analytic	Analytic	Holistic	Analytic	Holistic	Holistic	Analytic	3	2	5	4	5	3	2
281	71	Male	england	england	england	2	4	7	7	NA	2	2	2	7	3	3	5	2	5	3	2	2	60	10	30	5	20	20	10	40	10	40	Holistic	Holistic	Holistic	Analytic	Holistic	Holistic	Analytic	Holistic	Holistic	Holistic	1	6	3	3	4	2	4
282	25	Male	england	bangladesh	bangladesh	3	2	5	4	2	2	3	2	3	5	6	2	3	2	3	5	2	0	0	40	0	0	0	0	0	0	20	Analytic	Analytic	Analytic	Analytic	Analytic	Analytic	Analytic	Analytic	Analytic	Analytic	3	4	4	4	4	2	4
283	62	Female	bangladesh	bangladesh	bangladesh	1	1	1	3	1	1	1	4	1	1	1	1	1	1	4	1	7	50	50	50	50	50	50	50	50	50	50	Analytic	Analytic	Analytic	Analytic	Analytic	Analytic	Analytic	Analytic	Analytic	Analytic	1	1	7	4	1	7	1
284	44	Female	bangladesh	bangladesh	bangladesh	1	1	5	6	1	1	1	1	3	4	3	1	5	2	3	3	6	50	50	50	60	20	20	10	50	0	60	Analytic	Holistic	Analytic	Analytic	Holistic	Holistic	Analytic	Analytic	Holistic	Holistic	1	7	7	3	3	3	3
285	34	Male	pakistan	pakistan	pakistan	1	1	7	2	1	1	2	1	1	1	2	1	1	2	2	1	7	50	40	10	10	0	0	80	50	50	60	Holistic	Holistic	Holistic	Analytic	Holistic	Neither	Holistic	Holistic	Holistic	Holistic	1	1	7	2	3	1	1
286	55	Female	england	england	egypt	5	5	7	5	4	1	4	4	1	1	2	6	1	1	4	2	4	45	20	30	20	0	20	10	10	20	20	Analytic	Analytic	Analytic	Analytic	Holistic	Holistic	Analytic	Analytic	Analytic	Analytic	4	4	4	4	4	3	4
287	32	Male	bangladesh	bangladesh	bangladesh	7	4	2	4	4	1	2	2	3	3	3	4	4	3	2	4	6	50	20	70	15	60	50	50	20	70	40	Holistic	Holistic	Holistic	Holistic	Holistic	Holistic	Holistic	Holistic	Holistic	Holistic	1	2	4	3	3	2	2
288	19	Male	england	bangladesh	bangladesh	1	3	1	7	1	1	1	1	1	1	1	1	1	1	1	1	3	0	0	0	0	0	0	0	0	0	0	Holistic	Holistic	Holistic	Holistic	Holistic	Holistic	Analytic	Holistic	Holistic	Holistic	1	1	1	1	1	1	1
289	19	Female	bulgaria	bulgaria	bulgaria	1	3	7	7	2	2	2	1	6	3	1	1	1	2	1	1	2	60	70	40	70	25	20	60	40	30	50	Holistic	Holistic	Analytic	Holistic	Holistic	Holistic	Holistic	Analytic	Holistic	Holistic	2	1	7	6	2	2	2
290	25	Female	england	poland	poland	3	6	6	4	1	1	3	4	4	1	2	2	1	1	2	1	3	50	40	30	60	50	50	10	50	50	50	Holistic	Holistic	Analytic	Analytic	Holistic	Holistic	Holistic	Holistic	Holistic	Holistic	2	3	4	2	5	2	4
291	55	Male	england	scotland	austria	2	4	7	3	1	2	4	1	3	2	2	4	3	2	1	4	4	30	20	30	15	30	40	50	30	20	40	Analytic	Holistic	Analytic	Holistic	Holistic	Holistic	Holistic	Holistic	Holistic	Holistic	1	4	4	2	2	1	2
292	32	Female	england	bangladesh	bangladesh	2	2	7	5	1	1	2	1	5	2	2	1	6	3	2	3	4	50	60	50	50	50	40	50	50	50	40	Holistic	Holistic	Holistic	Holistic	Holistic	Holistic	Holistic	Holistic	Holistic	Holistic	2	1	6	1	5	3	1
293	25	Female	bangladesh	bangladesh	bangladesh	2	2	4	7	1	2	1	2	3	2	2	3	1	2	1	1	5	50	10	50	50	30	10	40	25	10	30	Holistic	Holistic	Holistic	Holistic	Holistic	Holistic	Holistic	Holistic	Holistic	Holistic	2	4	5	2	3	2	1
294	28	Female	bangladesh	bangladesh	pakistan	1	1	7	7	1	1	1	1	3	1	2	2	1	2	2	3	6	50	50	30	50	10	10	30	10	5	50	Holistic	Holistic	Holistic	Holistic	Holistic	Holistic	Holistic	Holistic	Holistic	Holistic	1	5	5	2	2	2	1
295	19	Female	england	kosovo	kosovo	4	1	6	7	2	2	2	1	7	2	5	1	4	6	2	5	6	45	50	30	45	30	20	50	30	30	50	Holistic	Holistic	Holistic	Holistic	Holistic	Holistic	Analytic	Analytic	Holistic	Holistic	1	3	4	2	5	1	2
296	33	Female	USA	uk	usa	2	2	7	6	2	2	3	2	6	5	5	2	5	3	4	4	3	50	30	35	50	30	45	35	45	30	50	Holistic	Holistic	Holistic	Holistic	Holistic	Holistic	Holistic	Holistic	Holistic	Holistic	2	2	5	3	6	3	3
297	73	Male	uk	uk	uk	2	1	4	5	1	1	1	5	7	7	7	7	3	1	7	7	4	80	60	20	90	10	50	20	20	NA	70	Holistic	Holistic	Holistic	Analytic	Holistic	Analytic	Analytic	Analytic	Holistic	Holistic	4	4	4	4	4	4	4
298	33	Male	england	bangladesh	bangladesh	3	3	7	7	1	NA	1	3	2	1	2	2	1	1	1	1	5	50	50	50	50	50	50	50	50	50	50	Holistic	Holistic	Holistic	Holistic	Holistic	Holistic	Holistic	Holistic	Holistic	Holistic	1	1	7	7	7	7	1
299	38	Female	england	bangladesh	bangladesh	2	1	7	3	3	3	5	3	1	3	3	1	2	4	2	3	5	90	50	60	70	50	50	60	50	50	80	Holistic	Holistic	Holistic	Holistic	Holistic	Holistic	Holistic	Holistic	Holistic	Holistic	1	1	6	5	4	2	2
300	44	Male	bangladesh	bangladesh	bangladesh	1	1	6	7	4	1	1	1	3	2	6	2	1	2	1	2	7	50	50	50	50	50	50	50	50	50	50	Holistic	Holistic	Holistic	Holistic	Holistic	Holistic	Holistic	Holistic	Holistic	Holistic	1	4	6	1	4	2	1
301	36	Female	bangladesh	bangladesh	bangladesh	1	1	6	5	1	1	1	1	2	2	1	1	3	2	1	3	3	1	0	0	0	0	0	0	0	0	0	Holistic	Holistic	Holistic	Holistic	Holistic	Holistic	Analytic	Holistic	Holistic	Holistic	1	1	1	1	1	2	3
302	27	Female	UK	bangladesh	bangladesh	2	3	3	4	4	1	1	1	1	3	3	1	1	1	1	1	6	80	80	70	90	50	50	50	50	50	50	Holistic	Holistic	Holistic	Holistic	Holistic	Holistic	Holistic	Holistic	Holistic	Holistic	1	4	5	3	3	3	2
303	32	Female	UK	bangladesh	bangladesh	1	1	1	1	1	1	1	1	1	1	1	1	1	1	1	1	2	100	90	50	50	100	100	100	50	50	50	Holistic	Holistic	Neither	Holistic	Holistic	Holistic	Holistic	Holistic	Holistic	Holistic	1	2	1	2	1	2	3
304	22	Female	england	bangladesh	bangladesh	1	1	1	3	1	1	1	1	3	1	1	1	1	1	3	1	5	100	100	100	100	0	100	100	100	100	100	Holistic	Holistic	Holistic	Holistic	Holistic	Holistic	Holistic	Holistic	Holistic	Holistic	1	1	1	1	3	5	2
305	54	Male	bangladesh	bangladesh	bangladesh	1	1	2	3	1	1	2	1	3	2	2	1	2	5	2	2	7	20	10	20	40	20	30	10	10	15	25	Holistic	Holistic	Neither	Holistic	Holistic	Neither	Holistic	Holistic	Holistic	Holistic	2	1	7	7	3	2	1
306	40	Female	bangladesh	bangladesh	bangladesh	1	1	3	5	2	1	2	1	3	1	2	1	2	2	3	2	1	40	45	50	60	70	50	55	60	40	60	Holistic	Holistic	Holistic	Holistic	Analytic	Neither	Neither	Holistic	Holistic	Holistic	1	2	3	4	2	3	2
307	44	Male	bangladesh	bangladesh	bangladesh	1	1	3	3	1	1	2	1	2	2	2	1	2	2	1	2	7	40	50	20	40	20	30	10	0	10	30	Holistic	Holistic	Holistic	Analytic	Holistic	Holistic	Analytic	Holistic	Holistic	Holistic	2	2	6	7	3	2	2
308	24	Male	bangladesh	bangladesh	bangladesh	1	1	6	7	1	2	1	1	1	2	2	3	3	3	1	2	7	60	50	70	50	50	30	100	100	20	50	Holistic	Holistic	Neither	Holistic	Holistic	Analytic	Neither	Holistic	Holistic	Holistic	2	3	4	3	2	2	4
309	60	Male	bangladesh	bangladesh	bangladesh	2	1	1	1	1	2	2	4	1	2	1	2	1	3	1	1	4	20	60	30	50	10	10	50	10	30	60	Holistic	Holistic	Holistic	Analytic	Holistic	Holistic	Holistic	Holistic	Holistic	Holistic	2	3	5	1	3	1	3
310	42	Male	bangladesh	bangladesh	bangladesh	1	1	3	4	2	2	1	2	2	4	2	1	2	2	2	2	5	50	80	20	50	10	10	15	20	20	50	Holistic	Holistic	Neither	Analytic	Holistic	Holistic	Holistic	Holistic	Holistic	Holistic	2	4	4	3	4	4	2
311	48	Male	bangladesh	bangladesh	bangladesh	1	1	2	6	1	1	1	1	2	2	1	2	5	2	3	3	1	40	30	25	20	30	35	15	50	40	20	Holistic	Holistic	Holistic	Holistic	Holistic	Neither	Neither	Holistic	Holistic	Holistic	2	3	4	5	2	2	1
312	40	Female	UK	bangadesh	bangladesh	1	1	2	1	1	1	1	1	2	3	1	2	7	1	1	7	6	40	40	10	10	10	10	90	10	10	70	Holistic	Holistic	Holistic	Analytic	Holistic	Holistic	Holistic	Holistic	Holistic	Holistic	7	7	1	7	1	1	7
313	59	Male	dhaka bangladesh	rajbari bangladesh	pangsha bangladesh	1	1	2	7	1	1	1	1	2	2	2	2	2	2	1	2	5	60	50	70	50	25	40	50	50	60	50	Holistic	Holistic	Neither	Analytic	Holistic	Holistic	Holistic	Holistic	Holistic	Holistic	1	7	1	2	2	2	1
314	28	Male	bangladesh	bangladesh	bangladesh	3	1	2	6	1	2	2	2	3	2	2	2	1	3	1	1	4	20	30	25	35	25	15	25	15	40	15	Holistic	Holistic	Neither	Analytic	Holistic	Holistic	Holistic	Holistic	Holistic	Holistic	5	5	3	5	6	4	3
315	26	Male	dhaka bangladesh	dhaka bangladesh	dhaka bangladesh	1	1	6	3	1	1	2	1	1	1	3	2	1	1	2	1	4	60	50	50	50	30	25	20	30	30	50	Holistic	Holistic	Holistic	Analytic	Holistic	Holistic	Holistic	Holistic	Holistic	Holistic	5	5	4	6	5	4	4
316	32	Male	bangladesh	bangladesh	bangladesh	1	1	3	6	1	2	1	1	3	1	1	1	1	1	1	1	4	10	5	30	50	90	30	50	10	20	30	Holistic	Holistic	Neither	Holistic	Holistic	Holistic	Holistic	Holistic	Holistic	Holistic	3	3	5	4	4	5	3
317	32	Female	bangladesh	bangladesh	bangladesh	1	1	6	3	1	1	2	1	1	1	1	2	1	1	1	1	6	50	30	30	40	50	20	10	30	40	30	Holistic	Holistic	Neither	Analytic	Holistic	Holistic	Holistic	Holistic	Holistic	Holistic	4	6	4	7	6	4	3
318	26	Male	bangladesh	bangladesh	bangladesh	1	2	2	4	1	1	1	1	2	1	4	1	1	4	1	1	5	75	45	20	80	25	15	65	60	55	80	Holistic	Holistic	Neither	Analytic	Holistic	Holistic	Holistic	Holistic	Holistic	Holistic	1	2	4	2	2	4	1
319	41	Female	bangladesh	bangladesh	bangladesh	1	1	6	3	1	1	2	1	4	1	1	4	1	5	1	2	7	70	70	30	50	20	40	40	50	40	60	Holistic	Holistic	Neither	Holistic	Holistic	Holistic	Holistic	Holistic	Holistic	Holistic	2	7	3	4	4	3	2
320	27	Female	bangladesh	bangladesh	bangladesh	1	3	5	5	2	3	2	1	1	2	2	4	5	3	2	3	7	50	25	10	35	5	10	70	50	60	40	Holistic	Analytic	Holistic	Analytic	Holistic	Holistic	Analytic	Analytic	Analytic	Analytic	3	4	7	5	7	7	6
321	41	Female	bangladesh	bangladesh	bangladesh	1	1	4	2	2	1	2	1	3	2	1	1	1	3	2	2	4	20	30	10	40	10	10	10	5	5	5	Holistic	Holistic	Neither	Holistic	Holistic	Neither	Holistic	Holistic	Holistic	Holistic	2	2	3	3	6	4	1
322	26	Male	bangladesh	bangladesh	bangladesh	4	2	1	5	1	1	1	1	1	2	1	3	1	4	1	2	4	30	25	10	30	0	25	20	25	35	10	Holistic	Holistic	Holistic	Holistic	Holistic	Neither	Holistic	Holistic	Holistic	Holistic	4	2	4	2	3	4	3
323	34	Male	bangladesh	bangladesh	bangladesh	2	2	2	6	2	2	2	3	2	2	2	2	2	2	2	5	1	20	50	10	40	0	10	50	60	60	80	Holistic	Holistic	Neither	Holistic	Holistic	Holistic	Holistic	Neither	Holistic	Holistic	2	2	6	7	6	2	2
324	36	Female	bangladesh	bangladesh	bangladesh	1	1	2	7	1	1	1	1	1	1	1	1	1	1	1	6	4	30	60	0	50	0	0	10	40	10	0	Holistic	Holistic	Neither	Holistic	Holistic	Holistic	Holistic	Neither	Holistic	Holistic	1	2	7	7	7	2	1
325	40	Male	bangladesh	bangladesh	bangladesh	1	1	3	4	1	1	3	1	1	3	2	2	2	2	1	3	4	60	25	15	40	10	30	90	55	10	20	Holistic	Holistic	Neither	Analytic	Holistic	Neither	Holistic	Holistic	Holistic	Holistic	6	3	4	5	2	5	2
326	28	Male	bangladesh	bangladesh	bangladesh	1	2	3	4	1	1	2	2	3	1	2	3	1	1	1	3	3	65	60	35	45	20	15	70	85	30	80	Holistic	Holistic	Holistic	Analytic	Holistic	Neither	Analytic	Holistic	Holistic	Holistic	1	1	4	3	2	3	2
327	30	Female	bangladesh	bangladesh	india	1	1	2	5	2	2	2	3	2	3	3	2	2	4	3	2	3	50	60	50	50	40	40	65	70	50	70	Analytic	Analytic	Analytic	Analytic	Analytic	Analytic	Analytic	Analytic	Analytic	Analytic	1	3	3	2	4	2	2
328	37	Male	bangladesh	india	bangladesh	1	1	2	3	2	2	2	2	1	2	1	3	1	3	2	2	3	50	50	30	30	10	20	10	5	90	50	Holistic	Holistic	Neither	Analytic	Holistic	Holistic	Holistic	Holistic	Holistic	Holistic	1	3	3	3	3	2	2
329	35	Male	bangladesh	bangladesh	bangladesh	1	1	7	7	1	1	1	1	7	1	1	1	1	1	1	1	7	50	40	30	50	40	50	60	50	30	20	Analytic	Analytic	Analytic	Analytic	Holistic	Analytic	Analytic	Analytic	Analytic	Holistic	1	3	7	5	2	3	1
330	19	Male	germany	bangladesh	bangladesh	1	1	4	6	1	1	2	2	3	2	4	2	5	2	1	2	7	50	49	39	72	43	82	32	85	43	14	Holistic	Holistic	Neither	Holistic	Holistic	Neither	Holistic	Holistic	Holistic	Holistic	2	2	6	4	4	4	3
[truncated: 40 more columns]
